# Supplementary material for: Photoexcited nitroarenes for alkylation of quinoxalin-2(1H)-ones
Source: Royal Society of Chemistry journal article supplement (doi:10.1039/d4cc04315d), 2024-01-01
Supplement: d4cc04315d1.pdf [file d4cc04315d1.pdf]

## *Supporting Information*

### **Photoexcited nitroarenes for alkylation of quinoxalin-2(1*H*)-ones**

Lingang Wu<sup>a\*</sup>, Zhaoxue Wang<sup>a</sup>, Yanling Qiao<sup>a</sup>, Lei Xie<sup>a\*</sup>, Qingmin Wang<sup>b\*</sup>

<sup>a</sup> School of Chemistry and Chemical Engineering, School of Pharmaceutical Sciences and Food Engineering, Liaocheng University, Liaocheng 252000, Shandong, People's Republic of China.

<sup>b</sup> State Key Laboratory of Elemento-Organic Chemistry, College of Chemistry, Nankai University, Tianjin 300071, People's Republic of China.

#### **Table of Contents**

1. General information (S2)
2. General procedure for the synthesis of products (S2-S8)
3. NMR spectra of products (S9-S31)
4. References (S31)

## General Information

Reagents were purchased from commercial sources and were used as received.  $^1\text{H}$  and  $^{13}\text{C}$  Nuclear Magnetic Resonance (NMR) spectra were recorded on Bruker Avance 500 Ultrashield NMR spectrometers. Chemical shifts ( $\delta$ ) were given in parts per million (ppm) and were measured downfield from internal tetramethylsilane. High-resolution mass spectrometry (HRMS) data were obtained on an FTICR-MS instrument (Ionspec 7.0 T). Conversion was monitored by thin layer chromatography (TLC). Flash column chromatography was performed over silica gel (100-200 mesh). The synthesis of the substrate refers to the published literature.<sup>S1</sup>

## General experimental procedure for the synthesis of products except 3f, 3h and 3o.

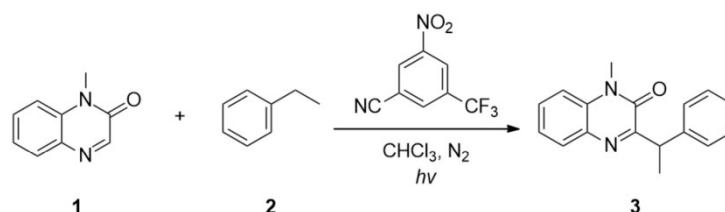

To a 10 mL glass vial was added quinoxalin-2(1H)-one **1** (0.2 mmol, 1.0 equiv), ethylbenzene **2** (0.4 mmol, 2 equiv), substituted nitrobenzene (0.3 mmol, 1.5 equiv) and 4 mL of  $\text{CHCl}_3$ . The reaction mixture was degassed by bubbling with nitrogen for 30 s with an outlet needle and the vial was sealed and the mixture was stirred under the irradiation with purple LEDs (395 nm) for 12 h at room temperature. After the reaction was complete, solvent was removed under reduced pressure, the mixture was subjected to flash column chromatography (PE/EtOAc = 5:1) to furnish the corresponding product **3**.

## General experimental procedure for the synthesis of products 3f, 3h and 3o.

To a 10 mL glass vial was added quinoxalin-2(1H)-one **1** (0.2 mmol, 1.0 equiv), ethylbenzene **2** (0.4 mmol, 2 equiv), substituted nitrobenzene (0.3 mmol, 1.5 equiv), TFA (0.2 mmol, 1.0 equiv), and 4 mL of  $\text{CHCl}_3$ . The reaction mixture was degassed by bubbling with nitrogen for 30 s with an outlet needle and the vial was sealed and the mixture was stirred under the irradiation with purple LEDs (395 nm) for 12 h at room temperature. After the reaction was complete, solvent was removed under reduced pressure, the mixture was subjected to flash column chromatography (PE/EtOAc = 5:1) to furnish the corresponding product **3**.

### 1-methyl-3-(1-phenylethyl)quinoxalin-2(1H)-one (**3a**)

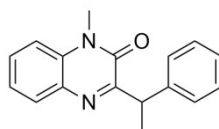

White solid (40.1 mg, 76%).  $^1\text{H}$  NMR (500 MHz,  $\text{CDCl}_3$ )  $\delta$  7.92 (dd,  $J$  = 8.0, 1.2 Hz, 1H), 7.54 – 7.47 (m, 1H), 7.46 – 7.39 (m, 2H), 7.37 – 7.31 (m, 1H), 7.26 (dt,  $J$  = 8.3, 7.6 Hz, 3H), 7.17 (t,  $J$  = 7.4 Hz, 1H), 4.82 (q,  $J$  = 7.1 Hz, 1H), 3.61 (s, 3H), 1.68 (d,  $J$  = 7.1 Hz, 3H).  $^{13}\text{C}$  NMR (125 MHz,  $\text{CDCl}_3$ )  $\delta$  161.9, 154.4, 143.1, 133.1, 132.7, 130.1, 129.7, 128.3, 128.1, 126.5, 123.4, 113.4, 41.8, 29.0, 19.6. HRMS (ESI): calcd. for  $\text{C}_{17}\text{H}_{16}\text{N}_2\text{NaO}$  [ $\text{M} + \text{Na}$ ] $^+$  287.1155; found 287.1160.

### 1-ethyl-3-(1-phenylethyl)quinoxalin-2(1H)-one (**3b**)

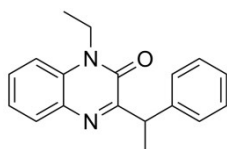

White solid (37.8 mg, 68%).  $^1\text{H}$  NMR (500 MHz,  $\text{CDCl}_3$ )  $\delta$  7.92 (dd,  $J = 8.0, 1.4$  Hz, 1H), 7.49 (ddd,  $J = 8.6, 7.3, 1.5$  Hz, 1H), 7.47 – 7.39 (m, 2H), 7.34 – 7.30 (m, 1H), 7.29 – 7.23 (m, 3H), 7.21 – 7.14 (m, 1H), 4.84 (q,  $J = 7.1$  Hz, 1H), 4.35 – 4.12 (m, 2H), 1.68 (d,  $J = 7.2$  Hz, 3H), 1.30 (t,  $J = 7.2$  Hz, 3H).  $^{13}\text{C}$  NMR (125 MHz,  $\text{CDCl}_3$ )  $\delta$  161.9, 153.9, 143.2, 133.0, 132.0, 130.4, 129.6, 128.3, 128.1, 126.4, 123.2, 113.3, 41.6, 37.3, 19.7, 12.4. HRMS (ESI): calcd. for  $\text{C}_{18}\text{H}_{19}\text{N}_2\text{O}$   $[\text{M} + \text{H}]^+$  279.1492; found 279.1494.

**1-benzyl-3-(1-phenylethyl)quinoxalin-2(1H)-one (3c)**

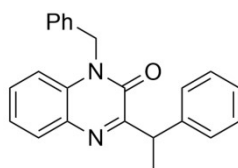

Yellow oil (30.6 mg, 45%).  $^1\text{H}$  NMR (500 MHz,  $\text{CDCl}_3$ )  $\delta$  7.92 (dd,  $J = 8.0, 1.5$  Hz, 1H), 7.48 – 7.43 (m, 2H), 7.39 – 7.35 (m, 1H), 7.31 – 7.24 (m, 5H), 7.23 – 7.10 (m, 5H), 5.53 (d,  $J = 15.7$  Hz, 1H), 5.29 (d,  $J = 15.7$  Hz, 1H), 4.89 (q,  $J = 7.1$  Hz, 1H), 1.72 (d,  $J = 7.1$  Hz, 3H).  $^{13}\text{C}$  NMR (125 MHz,  $\text{CDCl}_3$ )  $\delta$  162.0, 154.5, 143.2, 135.3, 133.0, 132.4, 130.2, 129.7, 128.8, 128.4, 128.1, 127.6, 126.8, 126.5, 123.5, 114.3, 45.9, 41.9, 19.7. HRMS (ESI): calcd. for  $\text{C}_{23}\text{H}_{20}\text{N}_2\text{NaO}$   $[\text{M} + \text{Na}]^+$  363.1468; found 363.1473.

**ethyl 2-(2-oxo-3-(1-phenylethyl)quinoxalin-1(2H)-yl)acetate (3d)**

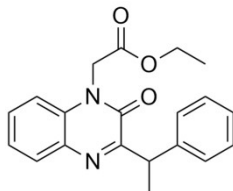

White solid (47.7 mg, 71%).  $^1\text{H}$  NMR (500 MHz,  $\text{CDCl}_3$ )  $\delta$  7.93 (dd,  $J = 8.0, 1.3$  Hz, 1H), 7.49 – 7.44 (m, 1H), 7.43 – 7.39 (m, 2H), 7.36 – 7.31 (m, 1H), 7.26 (t,  $J = 7.8$  Hz, 2H), 7.19 – 7.14 (m, 1H), 7.02 (d,  $J = 8.3$  Hz, 1H), 5.06 (d,  $J = 17.3$  Hz, 1H), 4.80 (dd,  $J = 12.2, 5.1$  Hz, 2H), 4.24 – 4.13 (m, 2H), 1.69 (d,  $J = 7.1$  Hz, 3H), 1.21 (t,  $J = 7.1$  Hz, 3H).  $^{13}\text{C}$  NMR (125 MHz,  $\text{CDCl}_3$ )  $\delta$  167.1, 161.7, 154.0, 143.0, 132.8, 132.2, 130.4, 129.8, 128.3, 128.0, 126.5, 123.7, 112.9, 61.9, 43.6, 41.9, 19.6, 14.0. HRMS (ESI): calcd. for  $\text{C}_{20}\text{H}_{21}\text{N}_2\text{O}_3$   $[\text{M} + \text{H}]^+$  337.1547; found 337.1552.

**3-(1-phenylethyl)-1-(prop-2-yn-1-yl)quinoxalin-2(1H)-one (3e)**

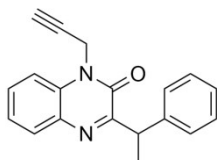

White solid (32.5 mg, 39%).  $^1\text{H}$  NMR (500 MHz,  $\text{CDCl}_3$ )  $\delta$  7.93 (dd,  $J = 8.0, 1.4$  Hz, 1H), 7.58 – 7.52 (m, 1H), 7.49 – 7.39 (m, 3H), 7.39 – 7.35 (m, 1H), 7.28 (dd,  $J = 11.1, 5.4$  Hz, 2H), 7.22 – 7.15 (m, 1H), 5.09 (dd,  $J = 17.4, 2.5$  Hz, 1H), 4.93 – 4.69 (m, 2H), 2.24 (t,  $J = 2.5$  Hz, 1H), 1.68 (d,  $J = 7.1$  Hz, 3H).  $^{13}\text{C}$  NMR (125 MHz,  $\text{CDCl}_3$ )  $\delta$  161.8, 153.4, 142.9, 132.9, 131.5, 130.3, 129.8, 128.4,

128.1, 126.5, 123.8, 114.0, 76.8, 73.1, 41.8, 31.5, 19.7. HRMS (ESI): calcd. for C<sub>19</sub>H<sub>17</sub>N<sub>2</sub>O [M + H]<sup>+</sup> 289.1335; found 289.1337.

**2-(1-phenylethyl)quinoxalin-2(1H)-one (3f)**

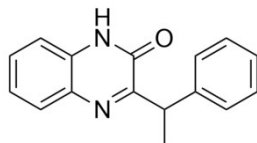

White solid (31 mg, 62%). <sup>1</sup>H NMR (500 MHz, CDCl<sub>3</sub>) δ 11.61 (s, 1H), 7.89 (d, *J* = 8.0 Hz, 1H), 7.58 – 7.37 (m, 3H), 7.32 (t, *J* = 7.6 Hz, 1H), 7.28 – 7.23 (m, 2H), 7.21 – 7.06 (m, 2H), 4.82 (q, *J* = 7.1 Hz, 1H), 1.71 (d, *J* = 7.1 Hz, 3H). <sup>13</sup>C NMR (125 MHz, CDCl<sub>3</sub>) δ 162.4, 155.8, 143.0, 132.8, 130.8, 129.7, 129.2, 128.3, 128.1, 126.5, 123.9, 115.3, 41.3, 19.4. HRMS (ESI): calcd. for C<sub>16</sub>H<sub>15</sub>N<sub>2</sub>O [M + H]<sup>+</sup> 251.1179; found 251.1185.

**6-bromo-1-methyl-3-(1-phenylethyl)quinoxalin-2(1H)-one (3g)**

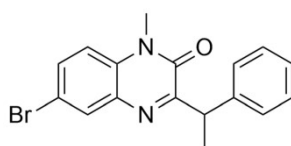

White solid (48 mg, 70%). <sup>1</sup>H NMR (500 MHz, CDCl<sub>3</sub>) δ 8.08 (d, *J* = 2.3 Hz, 1H), 7.59 (dd, *J* = 8.9, 2.3 Hz, 1H), 7.48 – 7.37 (m, 2H), 7.30 – 7.25 (m, 2H), 7.21 – 7.16 (m, 1H), 7.12 (d, *J* = 8.9 Hz, 1H), 4.81 (d, *J* = 7.1 Hz, 1H), 3.59 (s, 3H), 1.66 (d, *J* = 7.1 Hz, 3H). <sup>13</sup>C NMR (125 MHz, CDCl<sub>3</sub>) δ 163.3, 154.1, 142.7, 133.5, 132.5, 132.4, 132.2, 128.4, 128.1, 126.6, 116.0, 114.9, 41.9, 29.2, 19.5. HRMS (ESI): calcd. for C<sub>17</sub>H<sub>15</sub>BrN<sub>2</sub>NaO [M + Na]<sup>+</sup> 365.0260; found 365.0265.

**6-chloro-1-methyl-3-(1-phenylethyl)quinoxalin-2(1H)-one (3h)**

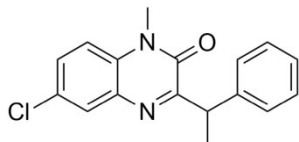

White solid (38.9 mg, 65%). <sup>1</sup>H NMR (500 MHz, CDCl<sub>3</sub>) δ 7.93 (s, 1H), 7.51 – 7.36 (m, 3H), 7.31 – 7.25 (m, 2H), 7.22 – 7.12 (m, 2H), 4.82 (q, *J* = 7.0 Hz, 1H), 3.60 (s, 3H), 1.66 (d, *J* = 7.1 Hz, 3H). <sup>13</sup>C NMR (125 MHz, CDCl<sub>3</sub>) δ 163.3, 154.1, 142.7, 133.2, 131.8, 129.6, 129.5, 128.7, 128.4, 128.1, 126.6, 114.6, 41.9, 29.2, 19.5. HRMS (ESI): calcd. for C<sub>17</sub>H<sub>16</sub>ClN<sub>2</sub>O [M + H]<sup>+</sup> 299.0946; found 299.0951.

**7-bromo-1-methyl-3-(1-phenylethyl)quinoxalin-2(1H)-one (3i)**

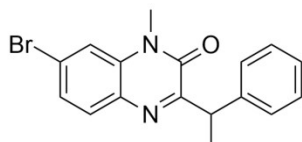

White solid (49.9 mg, 73%). <sup>1</sup>H NMR (500 MHz, CDCl<sub>3</sub>) δ 7.75 (d, *J* = 8.5 Hz, 1H), 7.45 – 7.36 (m, 4H), 7.30 – 7.24 (m, 2H), 7.20 – 7.12 (m, 1H), 4.78 (q, *J* = 7.1 Hz, 1H), 3.57 (s, 3H), 1.66 (d, *J* = 7.1 Hz, 3H). <sup>13</sup>C NMR (125 MHz, CDCl<sub>3</sub>) δ 162.3, 154.0, 142.8, 134.1, 131.5, 131.3, 128.4, 128.1, 126.6, 126.6, 123.6, 116.5, 41.9, 29.2, 19.5. HRMS (ESI): calcd. for C<sub>17</sub>H<sub>15</sub>BrN<sub>2</sub>NaO [M + Na]<sup>+</sup> 365.0260; found 365.0265.

**6,7-difluoro-1-methyl-3-(1-phenylethyl)quinoxalin-2(1H)-one (3j)**

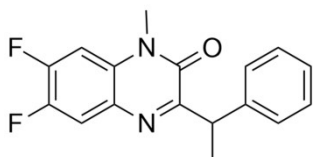

White solid (25.8 mg, 43%).  $^1\text{H}$  NMR (500 MHz,  $\text{CDCl}_3$ )  $\delta$  7.73 (dd,  $J = 10.2, 8.3$  Hz, 1H), 7.40 (d,  $J = 7.6$  Hz, 2H), 7.30 – 7.25 (m, 2H), 7.18 (t,  $J = 7.3$  Hz, 1H), 7.05 (dd,  $J = 11.3, 7.1$  Hz, 1H), 4.79 (q,  $J = 7.1$  Hz, 1H), 3.57 (s, 3H), 1.65 (d,  $J = 7.1$  Hz, 3H).  $^{13}\text{C}$  NMR (125 MHz,  $\text{CDCl}_3$ )  $\delta$  162.51 (d,  $J = 3.4$  Hz), 154.0, 151.1 (dd,  $J = 252.6, 14.4$  Hz), 146.5 (dd,  $J = 246.5, 13.8$  Hz), 142.6, 130.2 (d,  $J = 8.4$  Hz), 128.9 (dd,  $J = 9.2, 2.8$  Hz), 128.4, 128.1, 126.6, 117.7 (dd,  $J = 17.9, 1.9$  Hz), 102.0 (d,  $J = 23.0$  Hz), 41.8, 29.6, 19.5. HRMS (ESI): calcd. for  $\text{C}_{17}\text{H}_{15}\text{F}_2\text{N}_2\text{O}$   $[\text{M} + \text{H}]^+$  301.1147; found 301.1152.

**1-methyl-3-(1-phenylpropyl)quinoxalin-2(1H)-one (3k)**

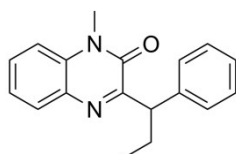

White solid (28.4 mg, 51%).  $^1\text{H}$  NMR (500 MHz,  $\text{CDCl}_3$ )  $\delta$  7.92 (d,  $J = 8.0$  Hz, 1H), 7.59 – 7.39 (m, 3H), 7.34 (t,  $J = 7.6$  Hz, 1H), 7.29 – 7.24 (m, 3H), 7.17 (t,  $J = 7.3$  Hz, 1H), 4.58 (t,  $J = 7.6$  Hz, 1H), 3.62 (s, 3H), 2.44 – 2.24 (m, 1H), 2.16 – 2.05 (m, 1H), 0.92 (t,  $J = 7.3$  Hz, 3H).  $^{13}\text{C}$  NMR (126 MHz,  $\text{CDCl}_3$ )  $\delta$  161.3, 154.6, 141.6, 133.0, 132.8, 130.1, 129.6, 128.7, 128.2, 126.5, 123.4, 113.4, 49.1, 29.1, 27.1, 12.4. HRMS (ESI): calcd. for  $\text{C}_{18}\text{H}_{19}\text{N}_2\text{O}$   $[\text{M} + \text{H}]^+$  279.1492; found 279.1492.

**2-benzhydryl-1-methylquinoxalin-2(1H)-one (3l)**

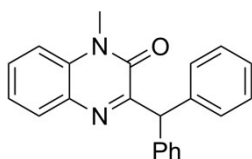

White solid (43.7 mg, 67%).  $^1\text{H}$  NMR (500 MHz,  $\text{CDCl}_3$ )  $\delta$  7.84 (dd,  $J = 8.0, 1.3$  Hz, 1H), 7.55 – 7.50 (m, 1H), 7.43 – 7.37 (m, 4H), 7.33 – 7.26 (m, 6H), 7.25 – 7.12 (m, 2H), 6.29 (s, 1H), 3.68 (s, 3H).  $^{13}\text{C}$  NMR (125 MHz,  $\text{CDCl}_3$ )  $\delta$  160.7, 154.6, 141.0, 133.0, 132.6, 130.5, 130.0, 129.5, 128.3, 126.6, 123.4, 113.5, 52.4, 29.3. HRMS (ESI): calcd. for  $\text{C}_{22}\text{H}_{18}\text{N}_2\text{NaO}$   $[\text{M} + \text{Na}]^+$  349.1311; found 349.1316.

**3-((4-bromophenyl)(phenyl)methyl)-1-methylquinoxalin-2(1H)-one (3m)**

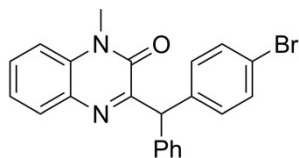

Yellow oil (51.8 mg, 64%).  $^1\text{H}$  NMR (500 MHz,  $\text{CDCl}_3$ )  $\delta$  7.82 (dd,  $J = 8.0, 1.4$  Hz, 1H), 7.56 – 7.49 (m, 1H), 7.43 – 7.39 (m, 2H), 7.38 – 7.34 (m, 2H), 7.33 – 7.25 (m, 6H), 7.25 – 7.20 (m, 1H), 6.22 (s, 1H), 3.66 (s, 3H).  $^{13}\text{C}$  NMR (126 MHz,  $\text{CDCl}_3$ )  $\delta$  160.1, 154.5, 140.4, 140.1, 133.0, 132.5, 131.3, 131.2, 130.4, 130.3, 129.3, 128.4, 126.9, 123.6, 120.7, 113.6, 51.8, 29.3. HRMS (ESI): calcd. for  $\text{C}_{22}\text{H}_{17}\text{BrN}_2\text{NaO}$   $[\text{M} + \text{Na}]^+$  427.0416; found 427.0421.

**3-(1-(2-bromophenyl)ethyl)-1-methylquinoxalin-2(1H)-one (3n)**

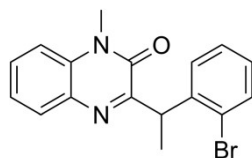

White solid (32.2 mg, 47%).  $^1\text{H}$  NMR (500 MHz,  $\text{CDCl}_3$ )  $\delta$  7.90 (dd,  $J = 8.0, 1.2$  Hz, 1H), 7.62 – 7.48 (m, 2H), 7.38 – 7.27 (m, 2H), 7.20 – 7.12 (m, 2H), 7.08 – 7.00 (m, 1H), 5.22 (q,  $J = 7.0$  Hz, 1H), 3.64 (s, 3H), 1.61 (d,  $J = 7.0$  Hz, 3H).  $^{13}\text{C}$  NMR (125 MHz,  $\text{CDCl}_3$ )  $\delta$  161.6, 154.3, 142.9, 133.2, 133.0, 132.6, 130.2, 129.9, 128.1, 127.9, 127.3, 125.0, 123.4, 113.5, 41.6, 29.1, 18.7. HRMS (ESI): calcd. for  $\text{C}_{17}\text{H}_{15}\text{BrN}_2\text{NaO}$  [ $\text{M} + \text{Na}$ ] $^+$  365.0260; found 365.0265.

**3-(1-(2-methoxyphenyl)ethyl)-1-methylquinoxalin-2(1H)-one (3o)**

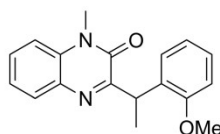

White solid (25.3 mg, 43%).  $^1\text{H}$  NMR (500 MHz,  $\text{CDCl}_3$ )  $\delta$  7.89 (dd,  $J = 8.0, 1.4$  Hz, 1H), 7.55 – 7.44 (m, 1H), 7.36 – 7.30 (m, 1H), 7.26 (d,  $J = 8.4$  Hz, 1H), 7.17 (td,  $J = 8.2, 1.7$  Hz, 1H), 7.12 (dd,  $J = 7.6, 1.5$  Hz, 1H), 6.94 – 6.79 (m, 2H), 5.22 (q,  $J = 7.0$  Hz, 1H), 3.86 (s, 3H), 3.63 (s, 3H), 1.59 (d,  $J = 7.1$  Hz, 3H).  $^{13}\text{C}$  NMR (125 MHz,  $\text{CDCl}_3$ )  $\delta$  162.8, 156.9, 154.3, 133.2, 132.7, 132.2, 130.0, 129.5, 127.4, 127.3, 123.3, 120.4, 113.4, 110.9, 55.8, 34.9, 29.0, 18.6. HRMS (ESI): calcd. for  $\text{C}_{18}\text{H}_{19}\text{N}_2\text{O}_2$  [ $\text{M} + \text{H}$ ] $^+$  295.1441; found 295.1446.

**1-methyl-3-(1-(*m*-tolyl)ethyl)quinoxalin-2(1H)-one (3p)**

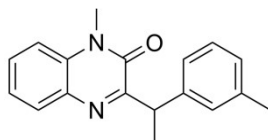

White solid (21.1 mg, 38%).  $^1\text{H}$  NMR (500 MHz,  $\text{CDCl}_3$ )  $\delta$  7.93 (dd,  $J = 8.0, 1.4$  Hz, 1H), 7.51 (ddd,  $J = 8.6, 7.4, 1.5$  Hz, 1H), 7.38 – 7.31 (m, 1H), 7.27 – 7.21 (m, 3H), 7.16 (t,  $J = 7.8$  Hz, 1H), 6.99 (d,  $J = 7.4$  Hz, 1H), 4.78 (q,  $J = 7.1$  Hz, 1H), 3.62 (s, 3H), 2.30 (s, 3H), 1.66 (d,  $J = 7.1$  Hz, 3H).  $^{13}\text{C}$  NMR (126 MHz,  $\text{CDCl}_3$ )  $\delta$  161.9, 154.4, 143.1, 137.8, 133.1, 132.7, 130.1, 129.6, 128.8, 128.2, 127.3, 125.1, 123.3, 113.4, 41.8, 29.0, 21.4, 19.7. HRMS (ESI): calcd. for  $\text{C}_{18}\text{H}_{19}\text{N}_2\text{O}$  [ $\text{M} + \text{H}$ ] $^+$  279.1492; found 279.1494.

**3-(1-(3-ethylphenyl)ethyl)-1-methylquinoxalin-2(1H)-one (3q)**

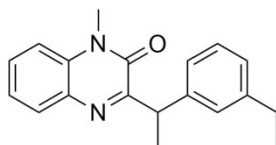

Yellow oil (21 mg, 36%).  $^1\text{H}$  NMR (500 MHz,  $\text{CDCl}_3$ )  $\delta$  7.92 (dd,  $J = 8.0, 1.4$  Hz, 1H), 7.53 – 7.46 (m, 1H), 7.36 – 7.32 (m, 1H), 7.28 – 7.23 (m, 3H), 7.18 (t,  $J = 7.5$  Hz, 1H), 7.02 (d,  $J = 7.5$  Hz, 1H), 4.81 (q,  $J = 7.1$  Hz, 1H), 3.62 (s, 3H), 2.60 (q,  $J = 7.6$  Hz, 2H), 1.67 (d,  $J = 7.1$  Hz, 3H), 1.20 (t,  $J = 7.6$  Hz, 3H).  $^{13}\text{C}$  NMR (125 MHz,  $\text{CDCl}_3$ )  $\delta$  162.0, 154.4, 144.2, 143.1, 133.0, 132.7, 130.1, 129.6, 128.2, 127.8, 126.0, 125.3, 123.4, 113.4, 41.8, 29.1, 28.8, 19.8, 15.4. HRMS (ESI): calcd. for  $\text{C}_{19}\text{H}_{21}\text{N}_2\text{O}$  [ $\text{M} + \text{H}$ ] $^+$  293.1648; found 293.1653.

**3-(1-(4-bromophenyl)ethyl)-1-methylquinoxalin-2(1H)-one (3r)**

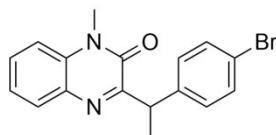

White solid (43.9 mg, 64%).  $^1\text{H}$  NMR (500 MHz,  $\text{CDCl}_3$ )  $\delta$  7.90 (dd,  $J = 8.0, 1.2$  Hz, 1H), 7.55 – 7.48 (m, 1H), 7.41 – 7.28 (m, 5H), 7.26 – 7.23 (m, 1H), 4.77 (q,  $J = 7.1$  Hz, 1H), 3.61 (s, 3H), 1.65 (d,  $J = 7.1$  Hz, 3H).  $^{13}\text{C}$  NMR (125 MHz,  $\text{CDCl}_3$ )  $\delta$  161.2, 154.3, 142.1, 133.0, 132.6, 131.4, 130.1, 129.9, 127.1, 123.5, 120.4, 113.5, 41.4, 29.1, 19.5. HRMS (ESI): calcd. for  $\text{C}_{17}\text{H}_{15}\text{BrN}_2\text{NaO}$  [ $\text{M} + \text{Na}$ ] $^+$  365.0260; found 365.0265.

**2-(1-(3,5-dibromophenyl)ethyl)-1-methylquinoxalin-2(1H)-one (3s)**

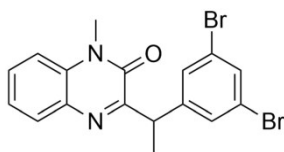

White solid (42.2 mg, 50%).  $^1\text{H}$  NMR (500 MHz,  $\text{CDCl}_3$ )  $\delta$  7.92 (d,  $J = 8.0$  Hz, 1H), 7.52 (dt,  $J = 9.8, 8.1$  Hz, 4H), 7.37 (t,  $J = 7.6$  Hz, 1H), 7.32 – 7.26 (m, 1H), 4.73 (q,  $J = 7.1$  Hz, 1H), 3.65 (s, 3H), 1.64 (d,  $J = 7.2$  Hz, 3H).  $^{13}\text{C}$  NMR (125 MHz,  $\text{CDCl}_3$ )  $\delta$  160.4, 154.2, 147.1, 133.1, 132.6, 132.2, 130.3, 130.2, 130.0, 123.6, 122.7, 113.6, 41.4, 29.2, 19.5. HRMS (ESI): calcd. for  $\text{C}_{17}\text{H}_{14}\text{Br}_2\text{N}_2\text{NaO}$  [ $\text{M} + \text{Na}$ ] $^+$  442.9365; found 442.9370.

**1-methyl-3-(4-methylbenzyl)quinoxalin-2(1H)-one (3t)**

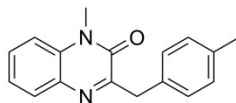

Yellow oil (15.8 mg, 30%).  $^1\text{H}$  NMR (500 MHz,  $\text{CDCl}_3$ )  $\delta$  7.75 (dt,  $J = 43.9, 21.9$  Hz, 1H), 7.46 – 7.40 (m, 1H), 7.32 – 7.20 (m, 3H), 7.17 (d,  $J = 7.6$  Hz, 1H), 7.04 – 6.99 (m, 2H), 4.14 (s, 2H), 3.57 (s, 3H), 2.21 (s, 3H).  $^{13}\text{C}$  NMR (125 MHz,  $\text{CDCl}_3$ )  $\delta$  159.5, 154.7, 136.1, 133.9, 133.3, 132.8, 129.9, 129.8, 129.4, 129.1, 123.5, 113.5, 40.4, 29.0, 21.0. HRMS (ESI): calcd. for  $\text{C}_{17}\text{H}_{16}\text{N}_2\text{NaO}$  [ $\text{M} + \text{Na}$ ] $^+$  287.1155; found 287.1160.

**3-cyclohexyl-1-methylquinoxalin-2(1H)-one (3u)**

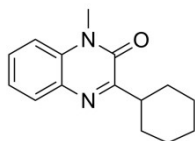

White solid (13.1 mg, 27%).  $^1\text{H}$  NMR (500 MHz,  $\text{CDCl}_3$ )  $\delta$  7.84 (dd,  $J = 8.0, 1.2$  Hz, 1H), 7.54 – 7.47 (m, 1H), 7.36 – 7.27 (m, 2H), 3.70 (s, 3H), 3.34 (tt,  $J = 11.6, 3.3$  Hz, 1H), 1.96 (d,  $J = 11.6$  Hz, 2H), 1.90 – 1.84 (m, 2H), 1.77 (d,  $J = 12.9$  Hz, 1H), 1.62 – 1.59 (m, 1H), 1.57 – 1.52 (m, 1H), 1.52 – 1.43 (m, 2H), 1.36 – 1.29 (m, 1H).  $^{13}\text{C}$  NMR (126 MHz,  $\text{CDCl}_3$ )  $\delta$  164.3, 154.5, 132.9, 132.8, 129.8, 129.3, 123.3, 113.4, 40.8, 30.5, 29.0, 26.3, 26.1. HRMS (ESI): calcd. for  $\text{C}_{15}\text{H}_{19}\text{N}_2\text{O}$  [ $\text{M} + \text{H}$ ] $^+$  243.1492; found 243.1494.

**1-methyl-3-(1-(naphthalen-1-yl)ethyl)quinoxalin-2(1H)-one (3v)**

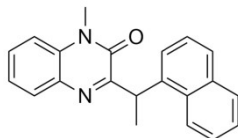

White solid (26.4 mg, 42%).  $^1\text{H}$  NMR (500 MHz,  $\text{CDCl}_3$ )  $\delta$  8.43 (d,  $J = 8.5$  Hz, 1H), 7.91 (dd,  $J = 8.0, 1.4$  Hz, 1H), 7.83 (d,  $J = 8.1$  Hz, 1H), 7.69 (d,  $J = 8.0$  Hz, 1H), 7.55 (ddd,  $J = 8.4, 6.8, 1.3$  Hz, 1H), 7.52 – 7.43 (m, 2H), 7.42 – 7.26 (m, 3H), 7.25 – 7.19 (m, 1H), 5.65 (q,  $J = 7.0$  Hz, 1H), 3.59 (s, 3H), 1.78 (d,  $J = 7.1$  Hz, 3H).  $^{13}\text{C}$  NMR (125 MHz,  $\text{CDCl}_3$ )  $\delta$  162.4, 154.5, 139.9, 134.1, 133.1, 132.7, 131.7, 130.1, 129.7, 128.8, 127.1, 126.2, 125.4, 125.3, 124.4, 123.7, 123.4, 113.5, 37.1, 29.1, 19.6. HRMS (ESI): calcd. for  $\text{C}_{17}\text{H}_{14}\text{Br}_2\text{N}_2\text{NaO}$   $[\text{M} + \text{Na}]^+$  442.9365; found 442.9370.

**1-([1,1'-biphenyl]-4-yl)ethanol (5)**

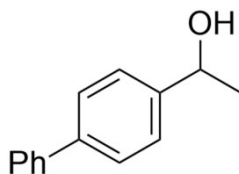

White solid (69.3 mg, 70%).  $^1\text{H}$  NMR (500 MHz,  $\text{CDCl}_3$ )  $\delta$  7.63 – 7.54 (m, 4H), 7.49 – 7.38 (m, 4H), 7.37 – 7.31 (m, 1H), 4.94 (q,  $J = 6.4$  Hz, 1H), 1.93 (s, 1H), 1.53 (d,  $J = 6.5$  Hz, 3H).



# NMR spectra of products

## NMR spectra of product 3a

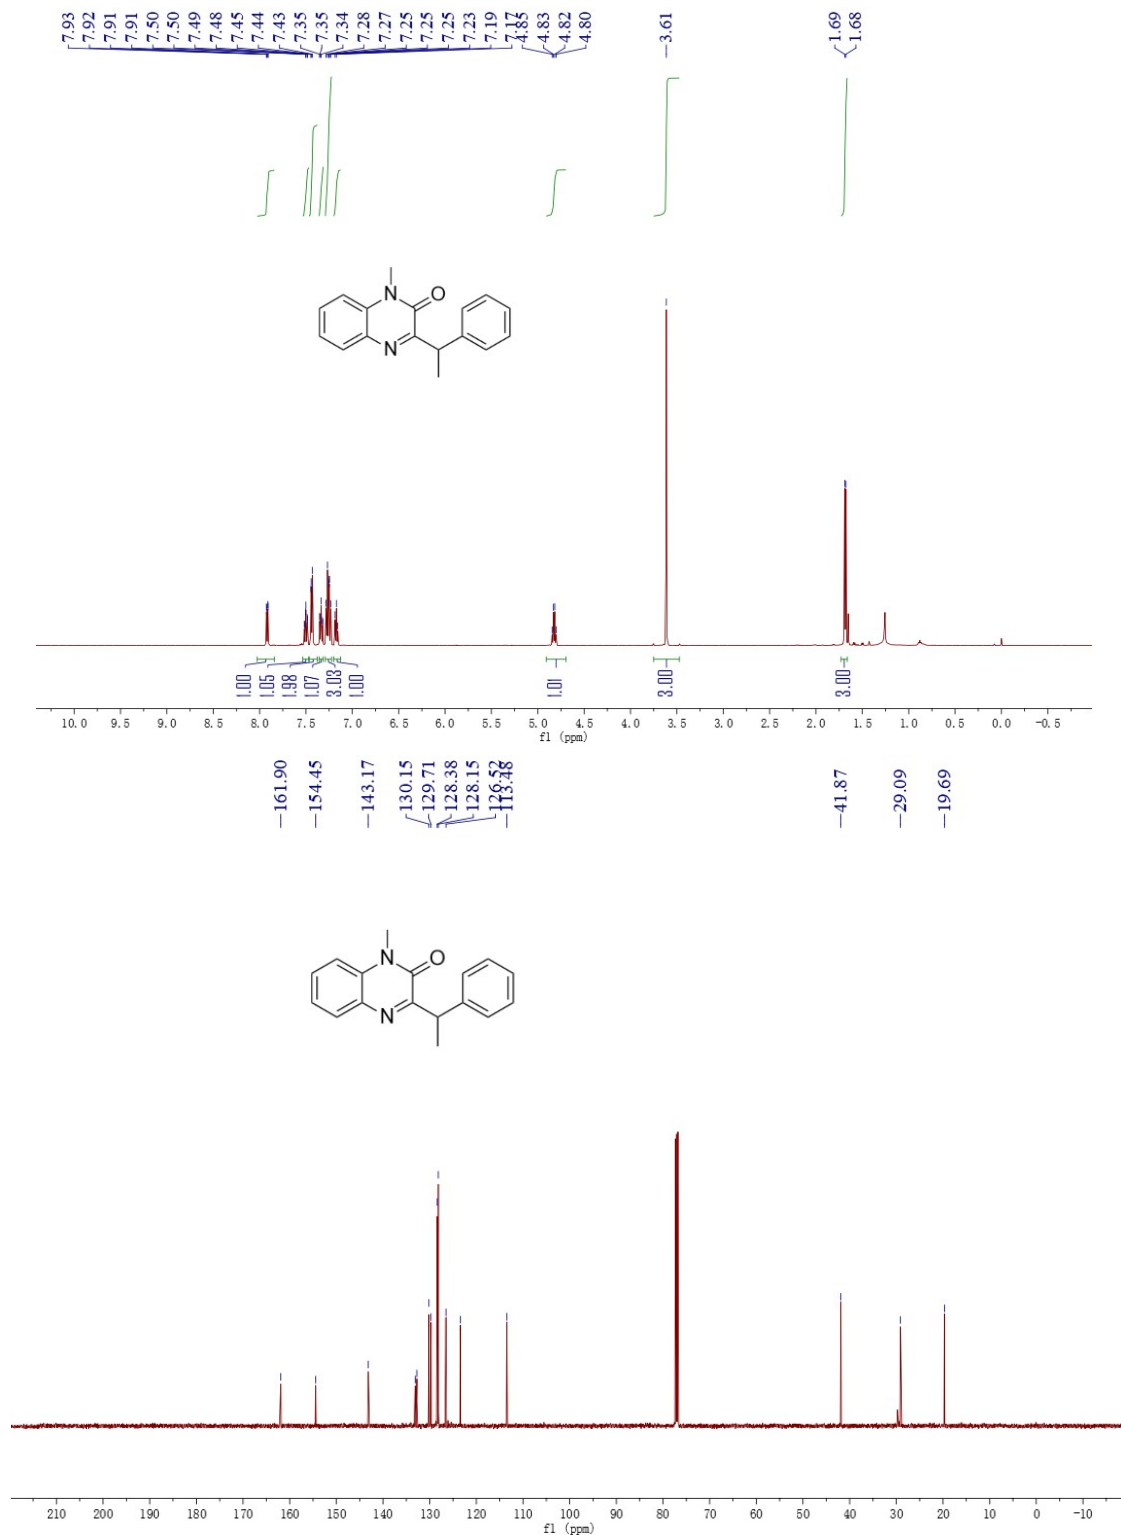

### NMR spectra of product 3b

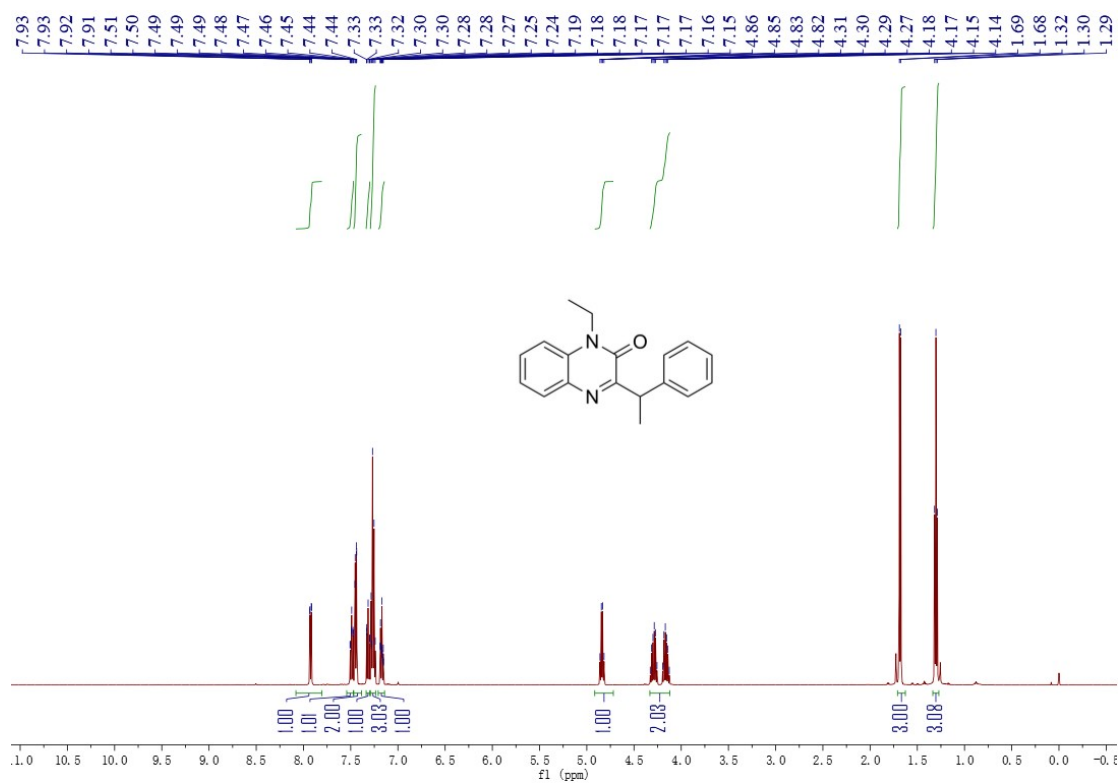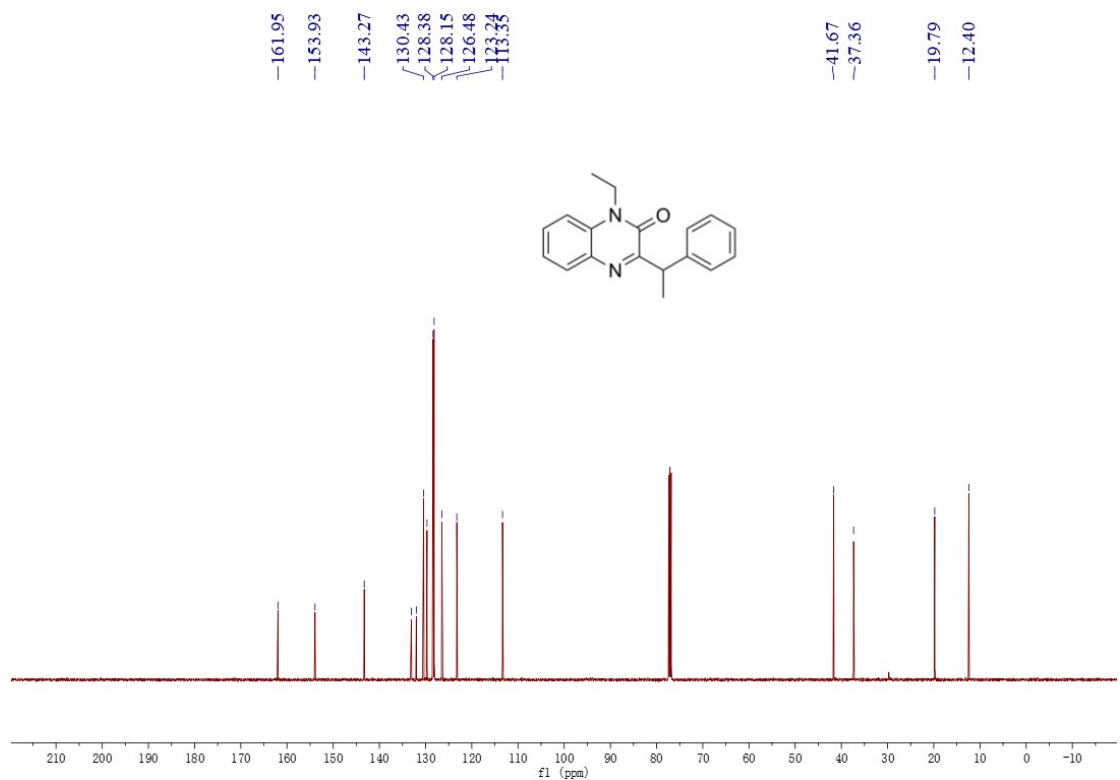

### NMR spectra of product 3c

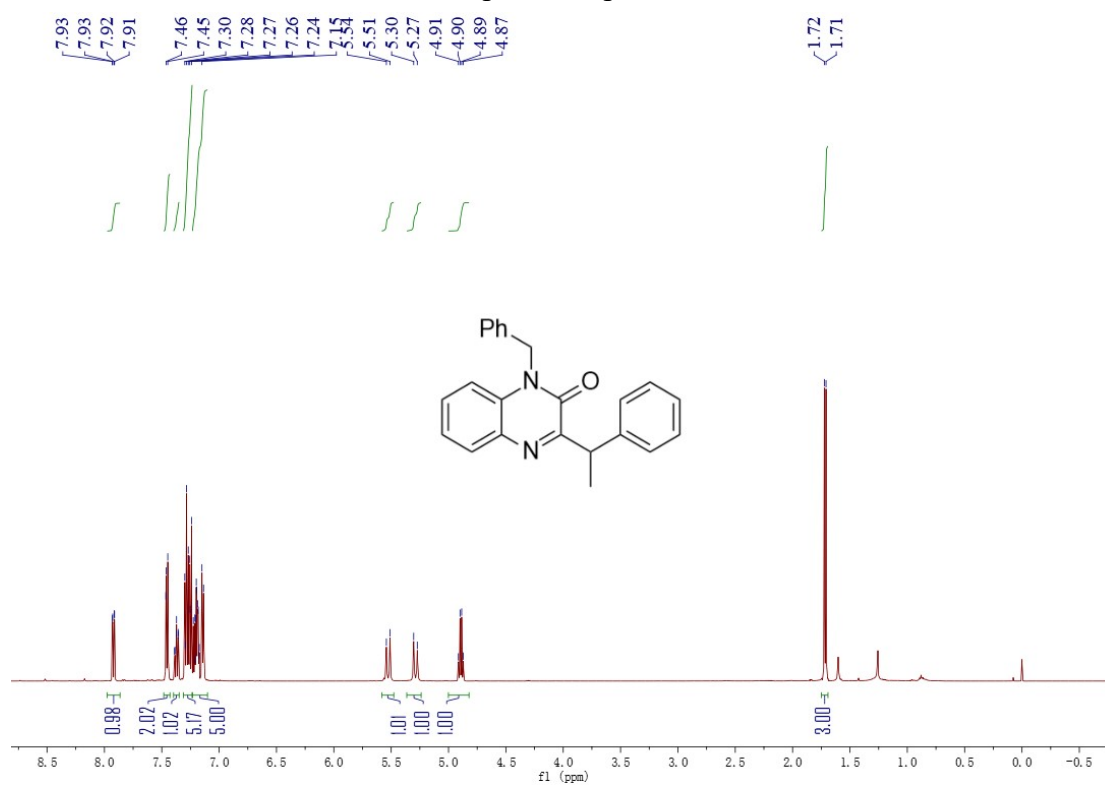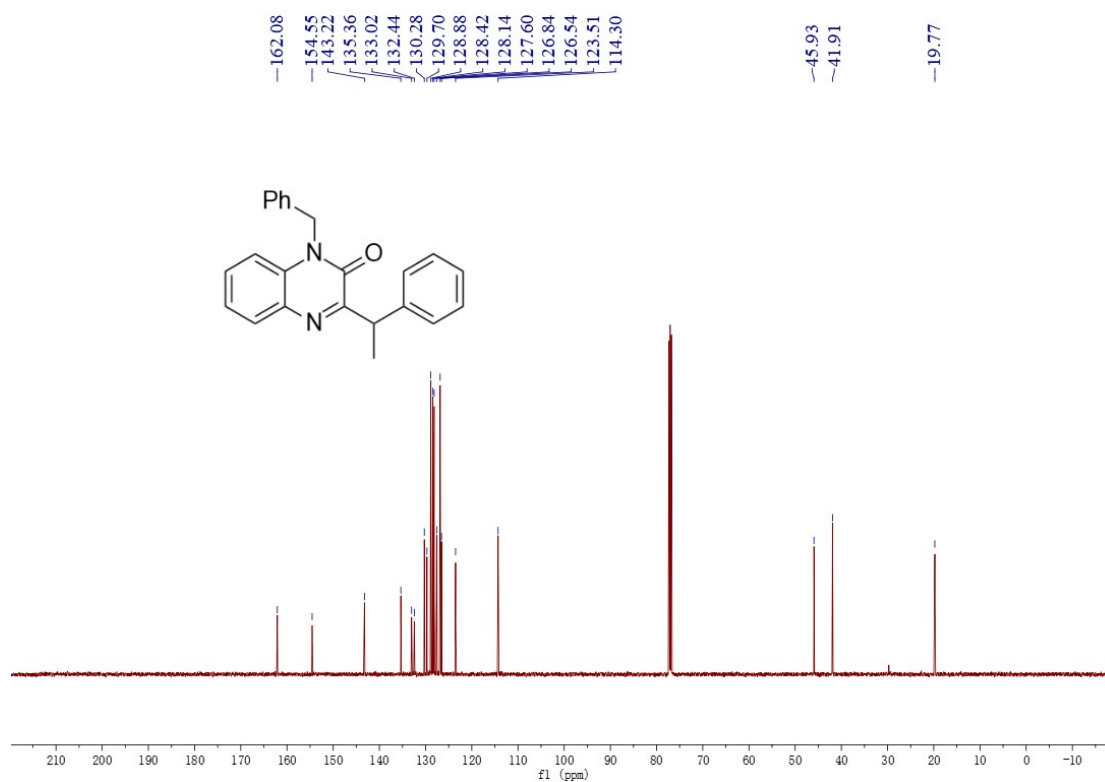

### NMR spectra of product 3d

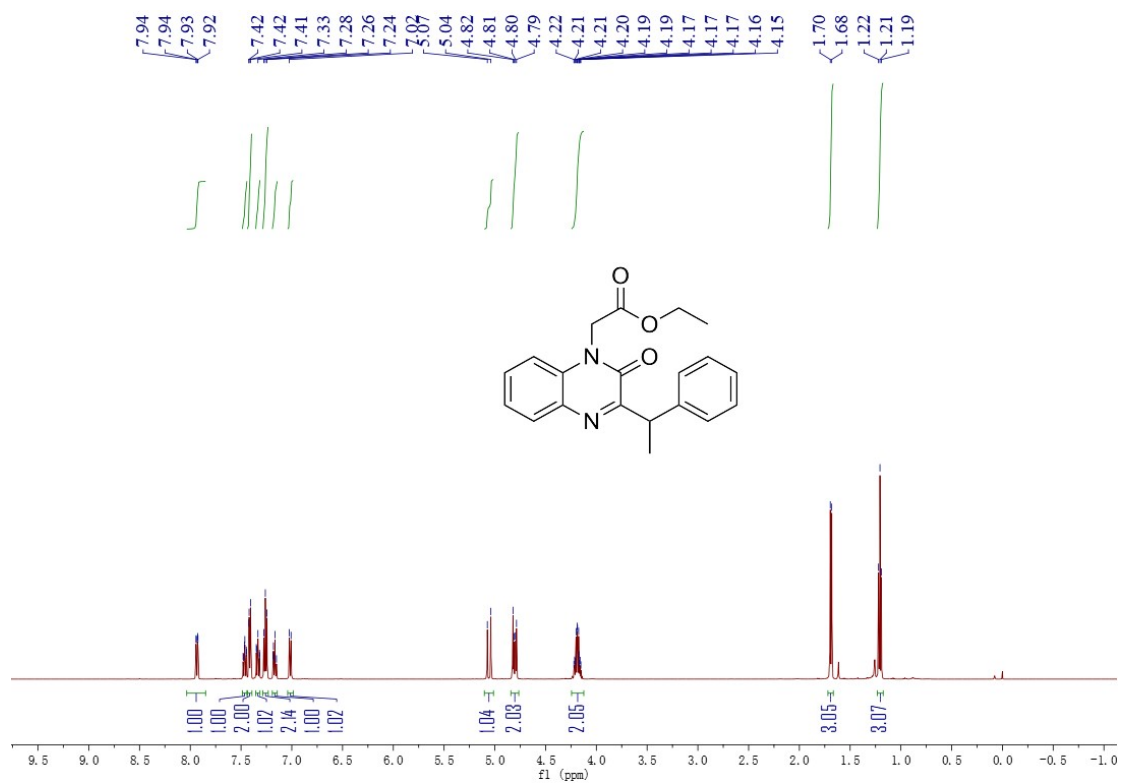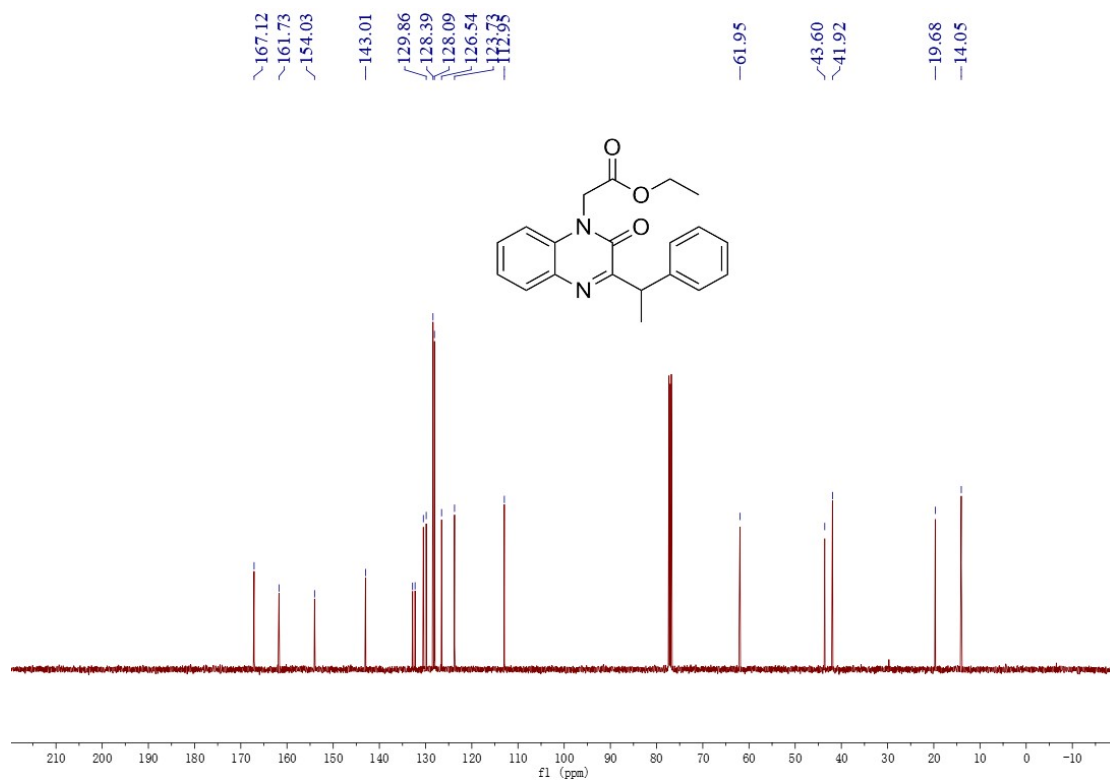

### NMR spectra of product 3e

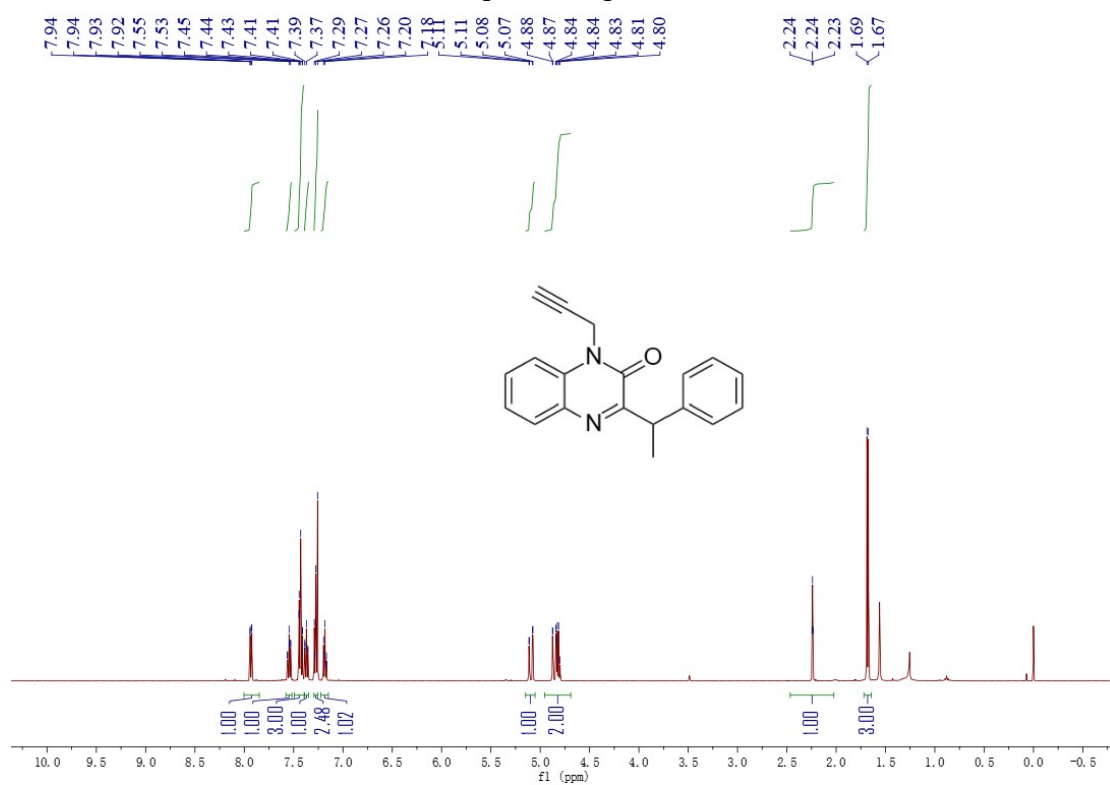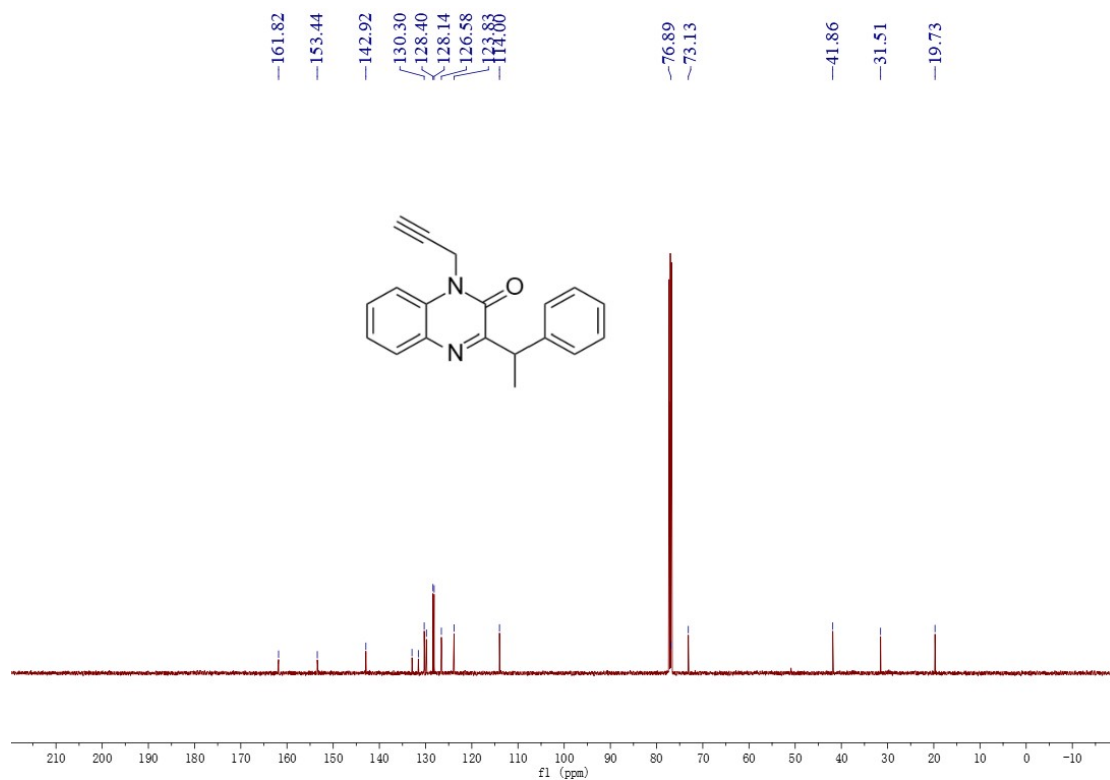

### NMR spectra of product **3f**

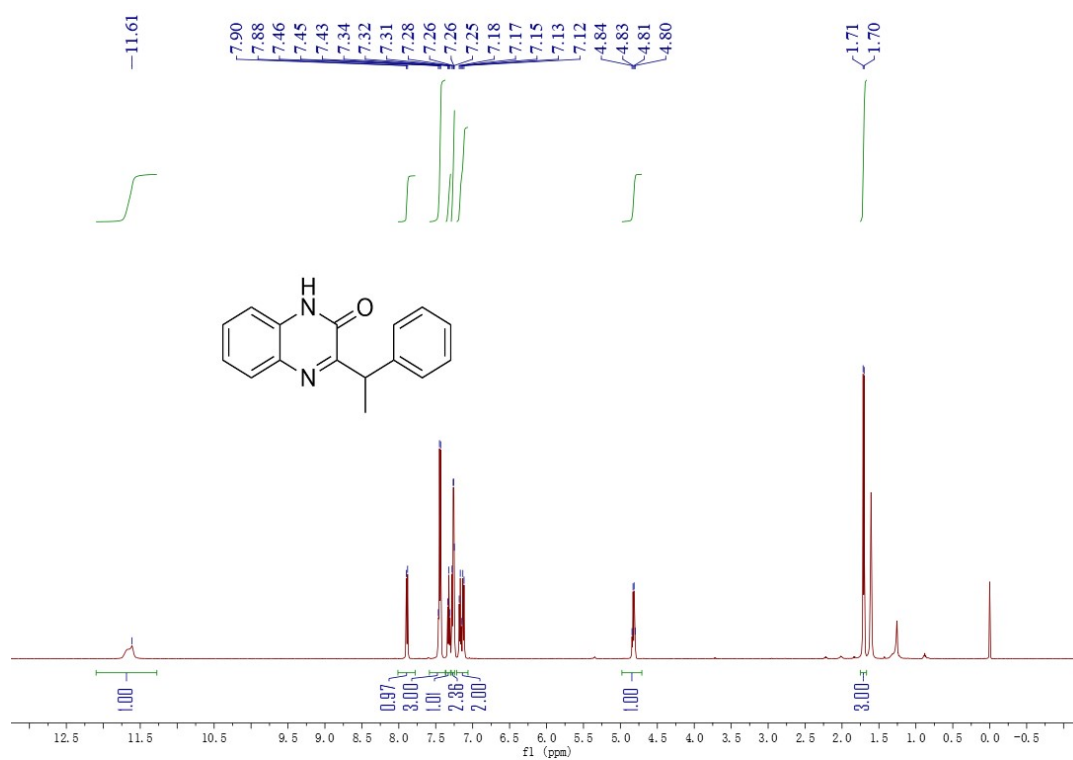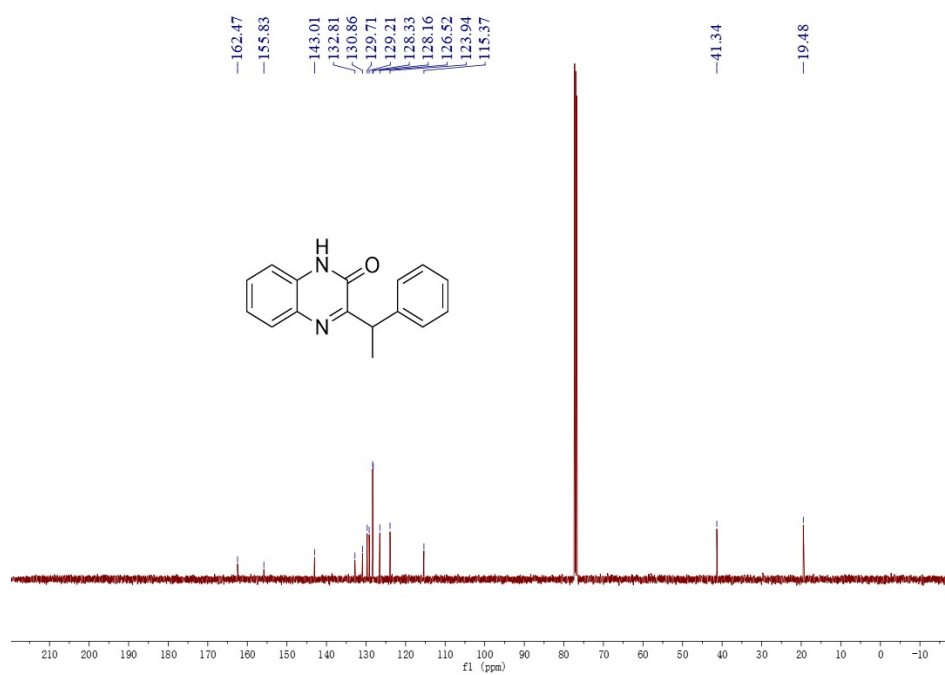

### NMR spectra of product **3g**

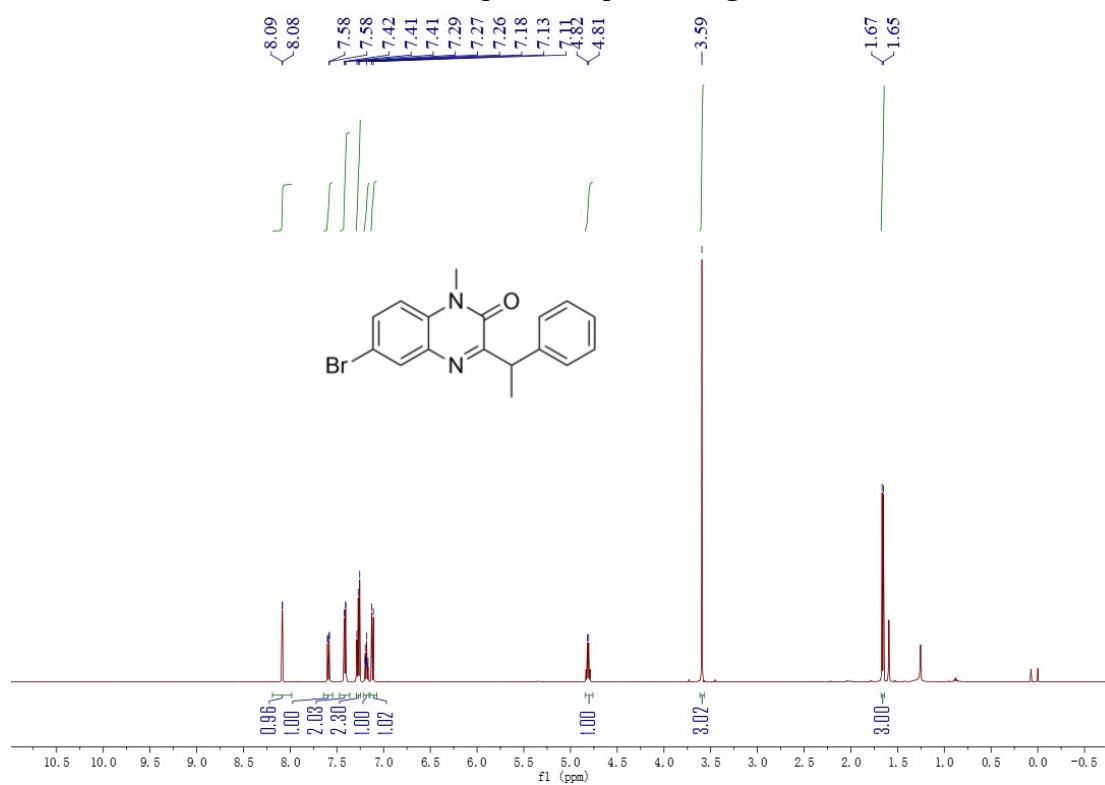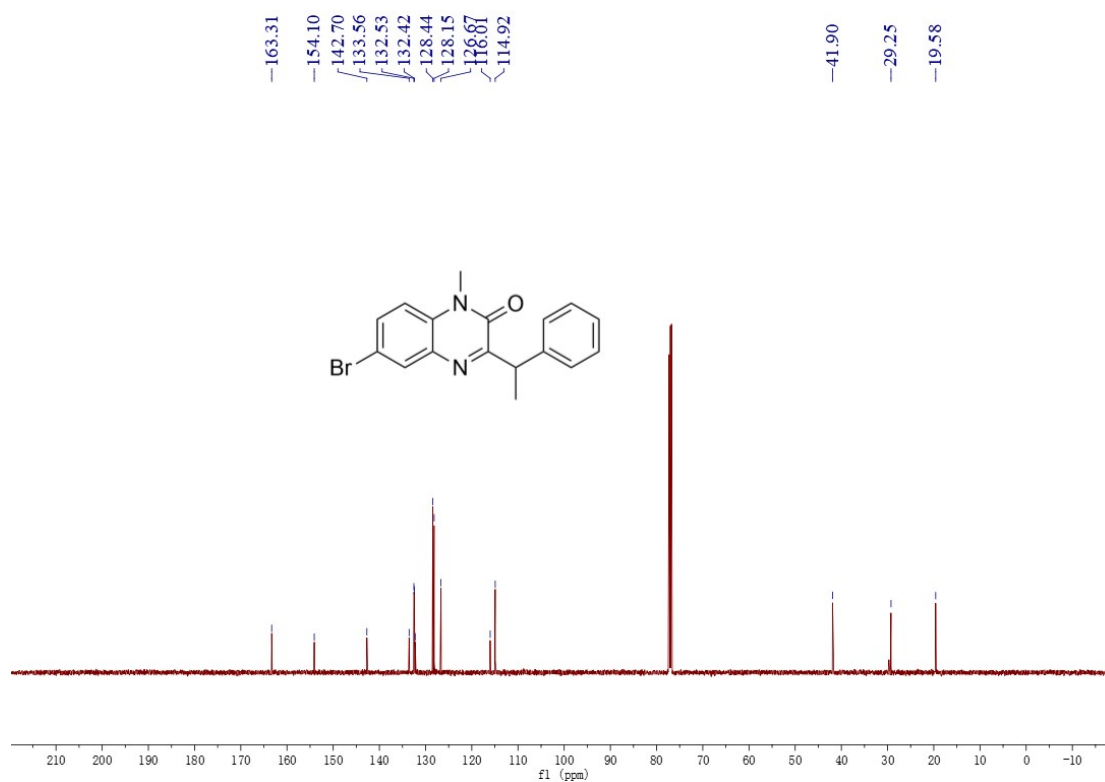

### NMR spectra of product 3h

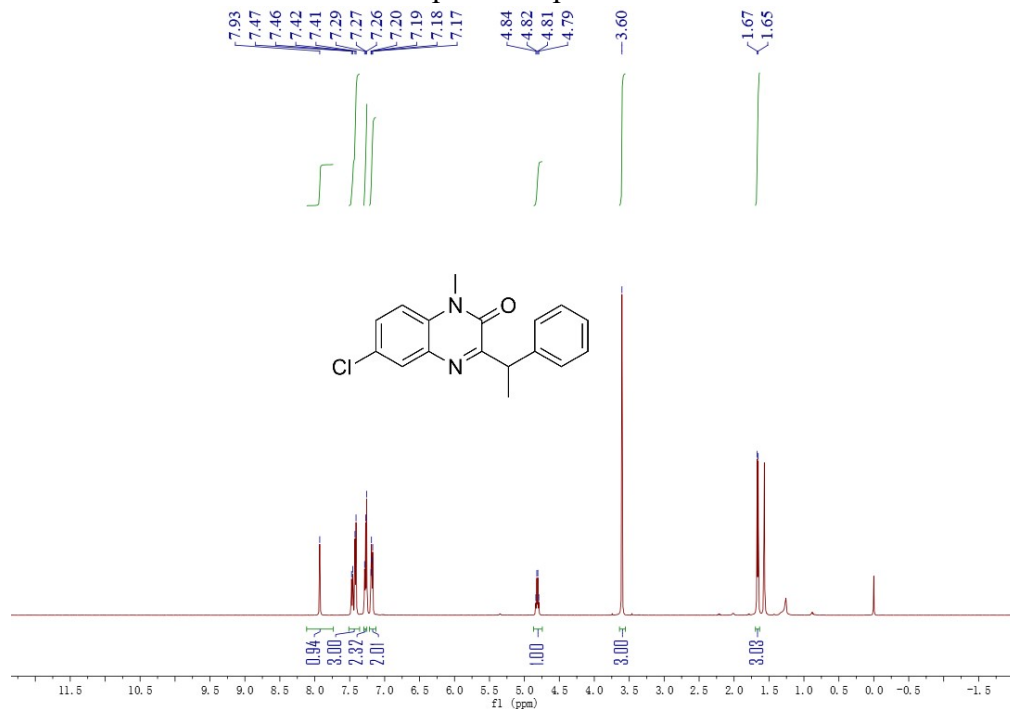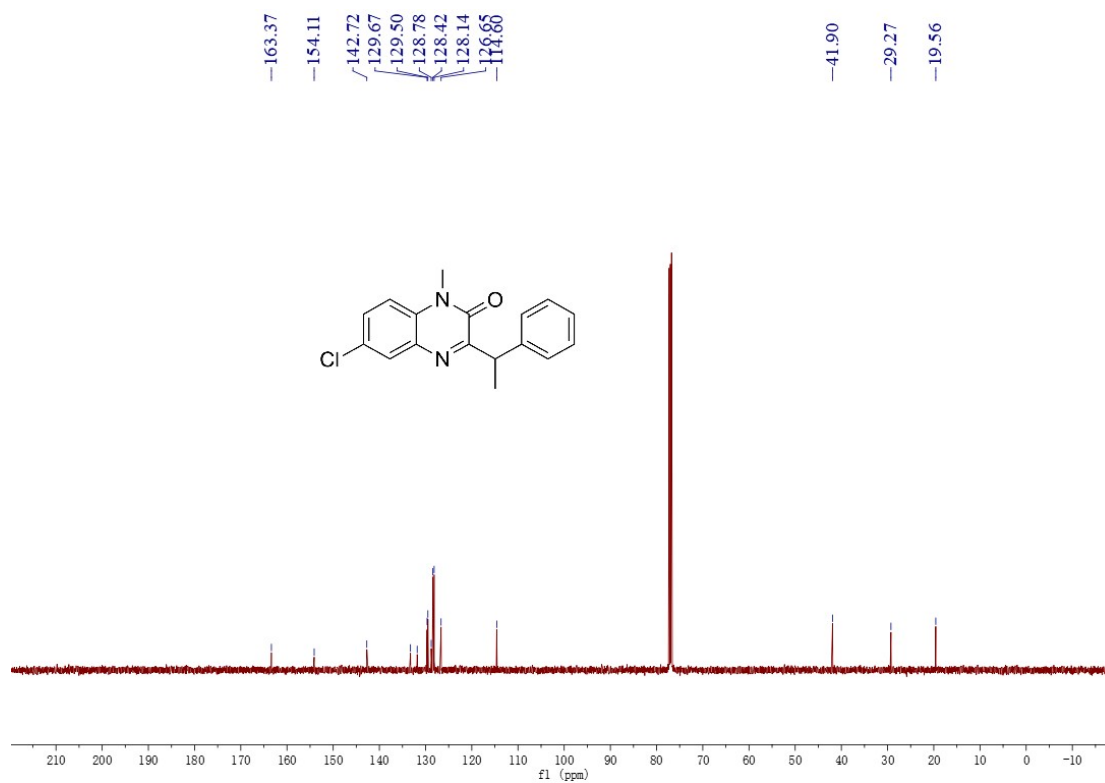



### NMR spectra of product **3i**

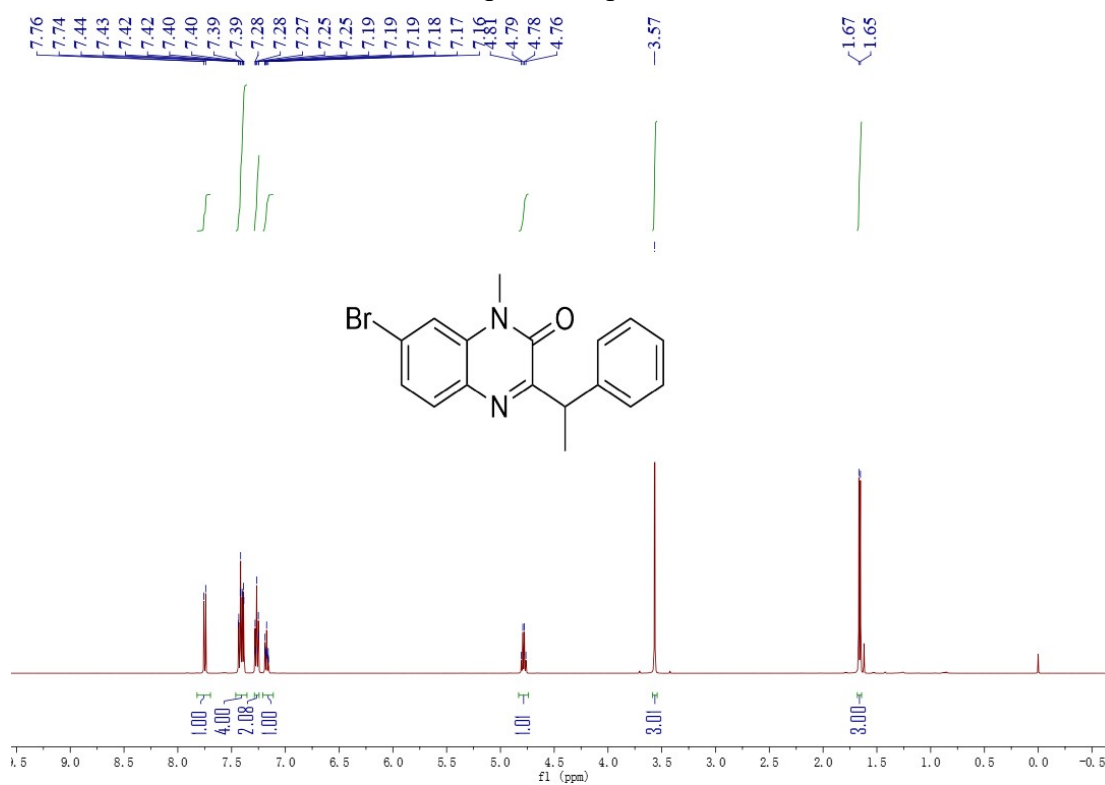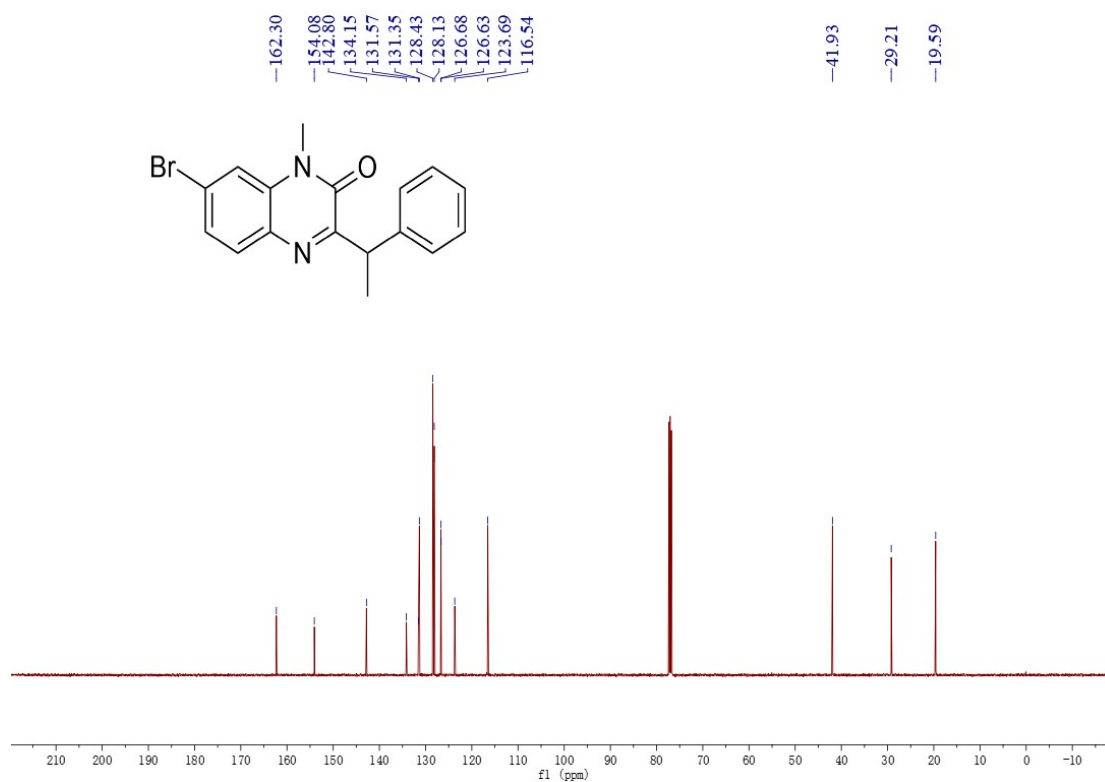

### NMR spectra of product **3j**

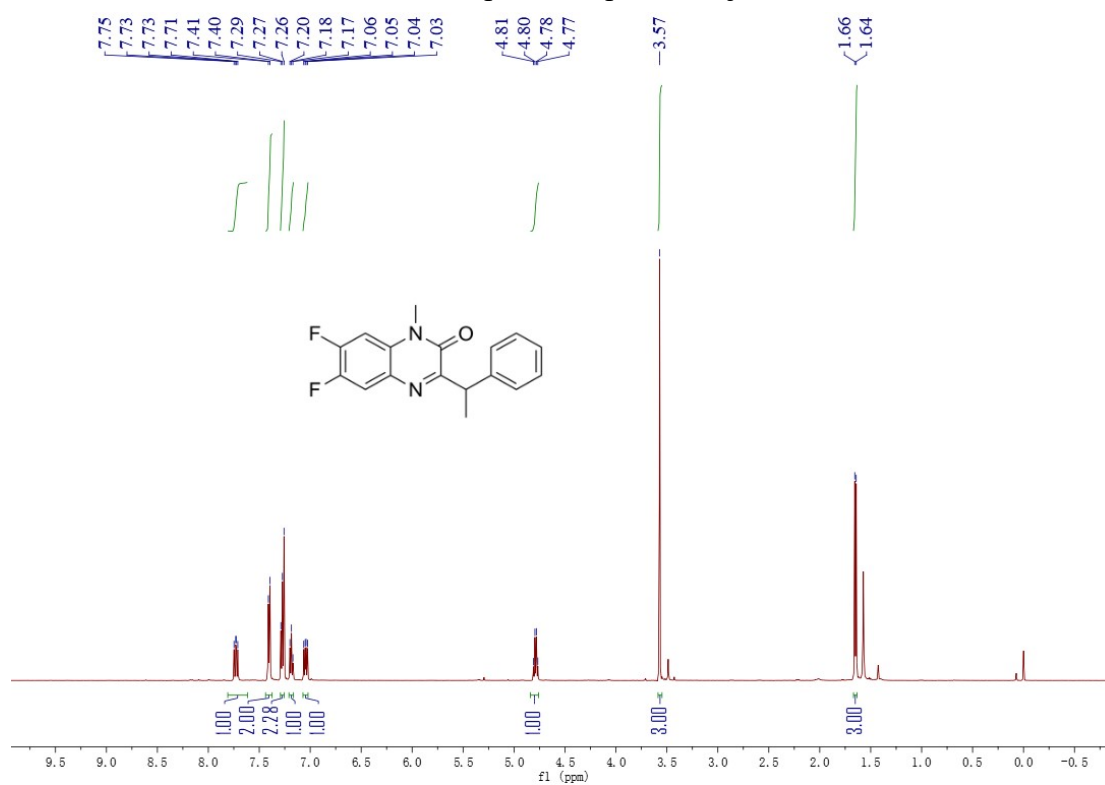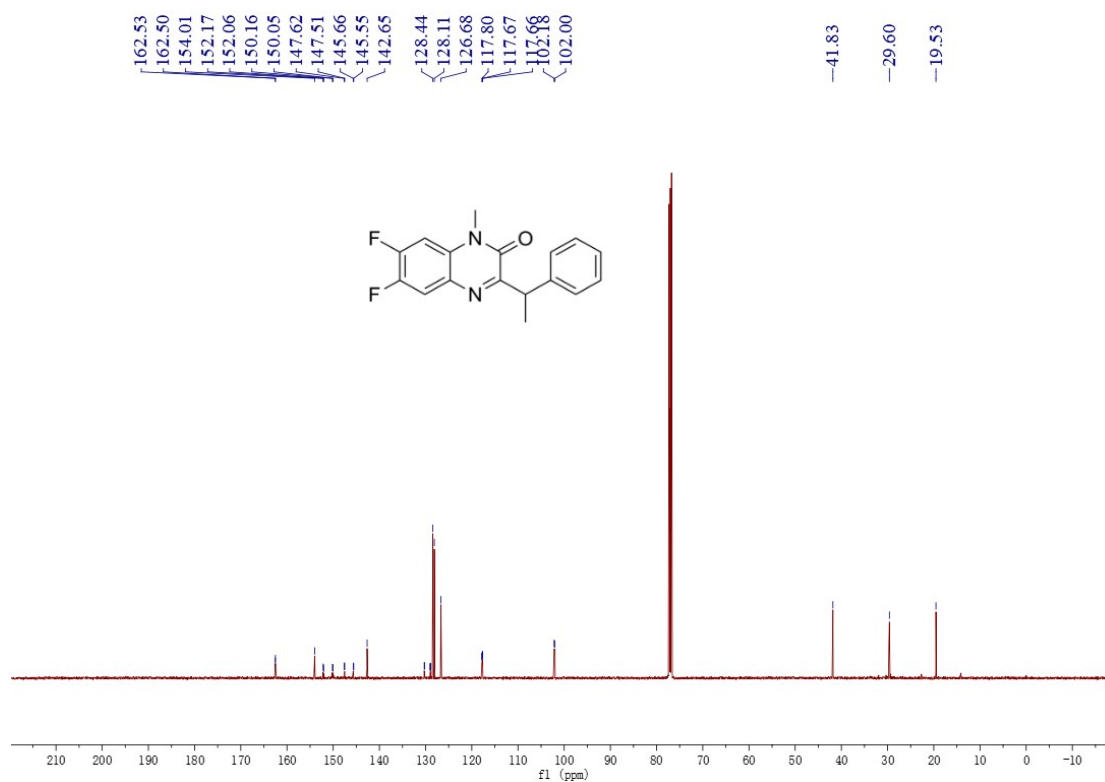

NMR spectra of product 3k

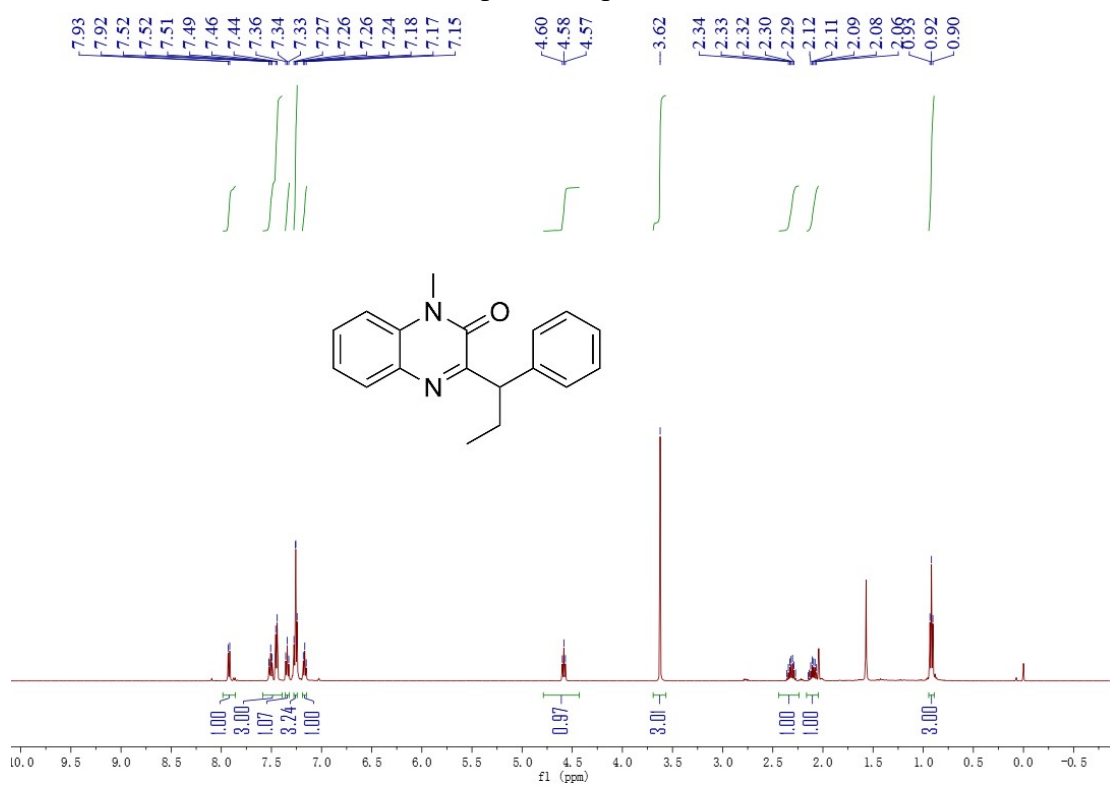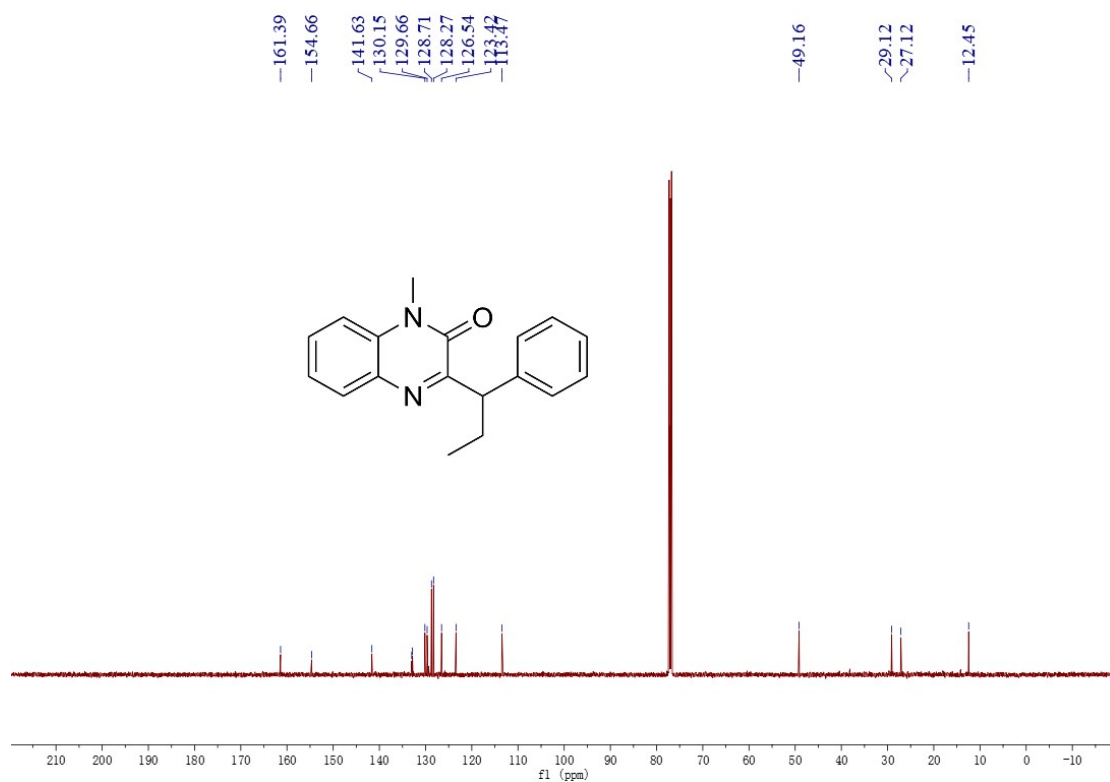

# NMR spectra of product **31**

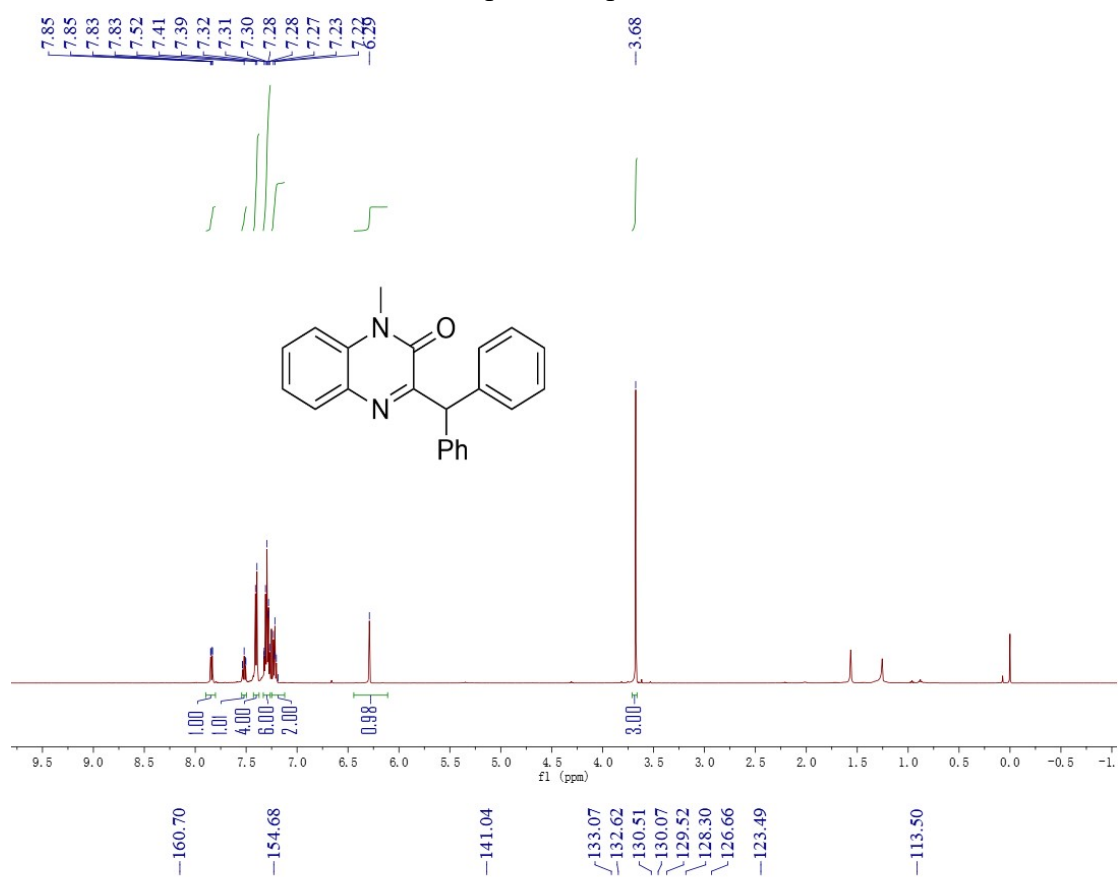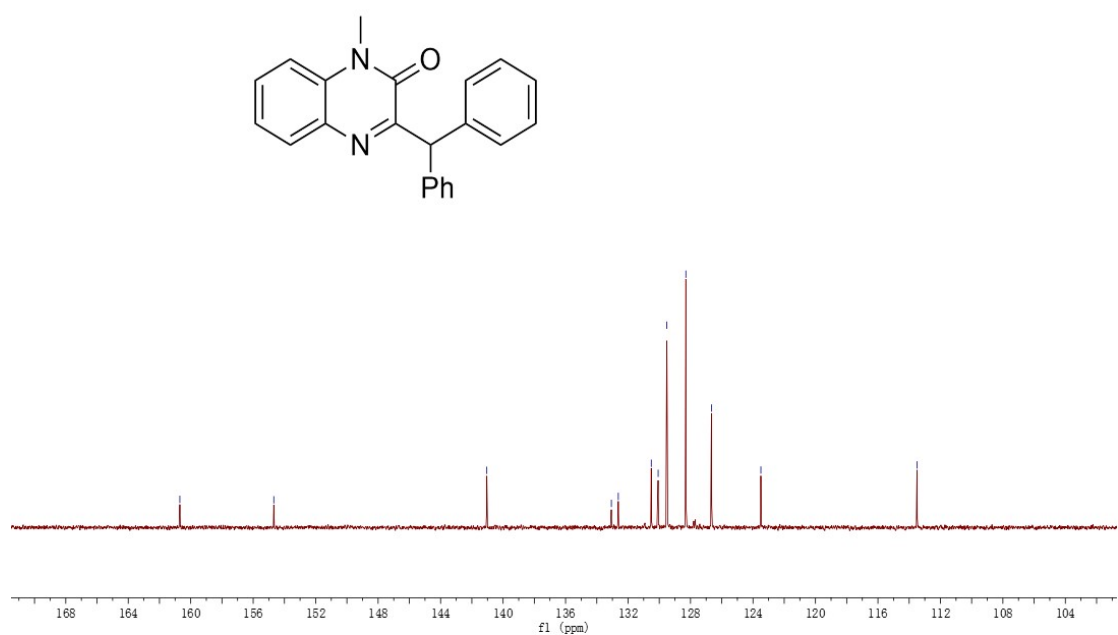

### NMR spectra of product **3m**

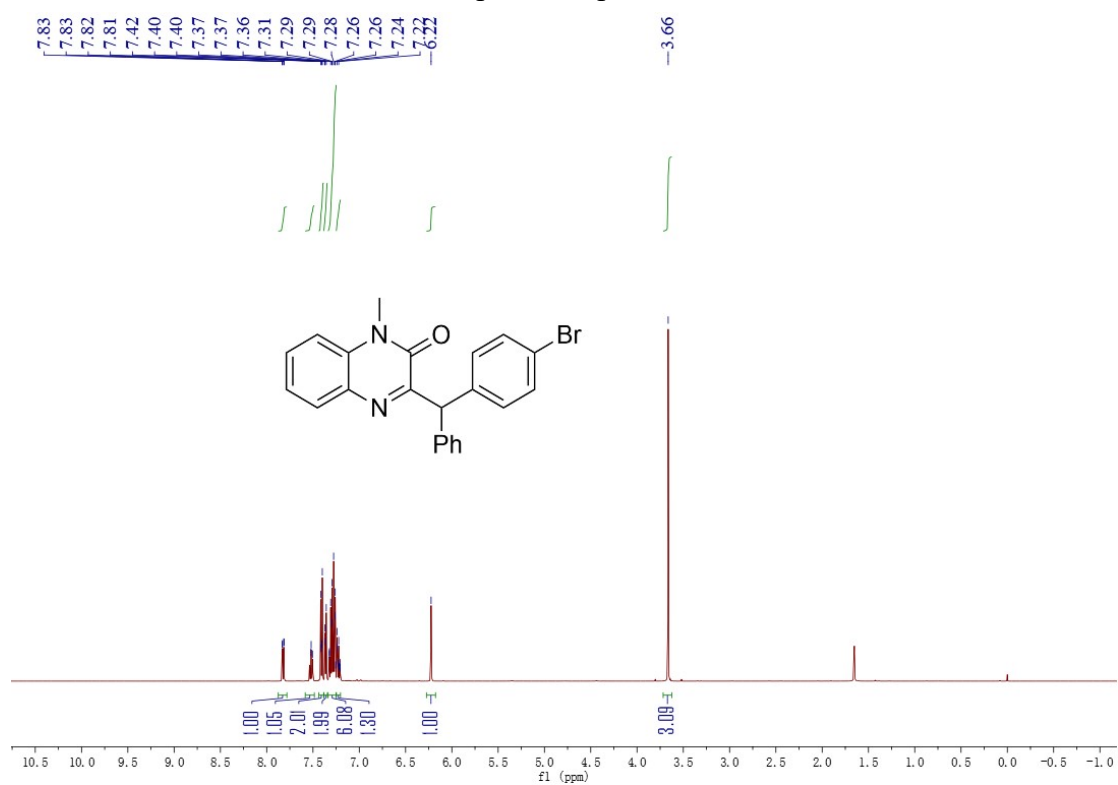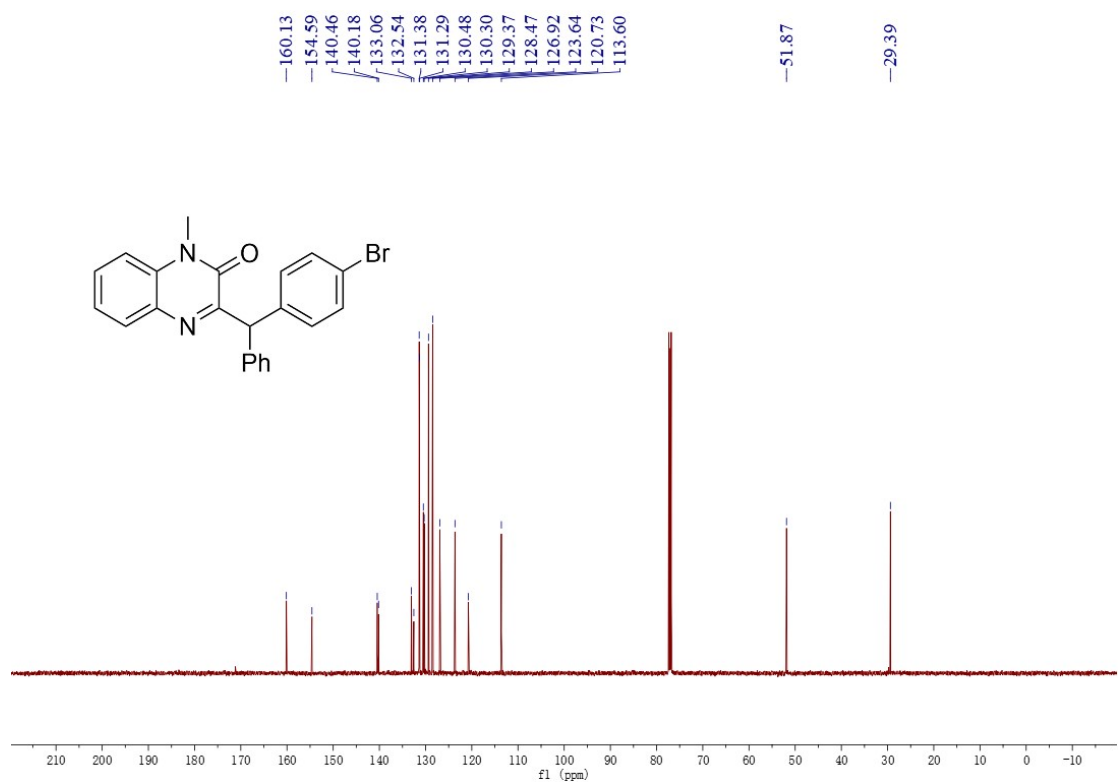

### NMR spectra of product 3n

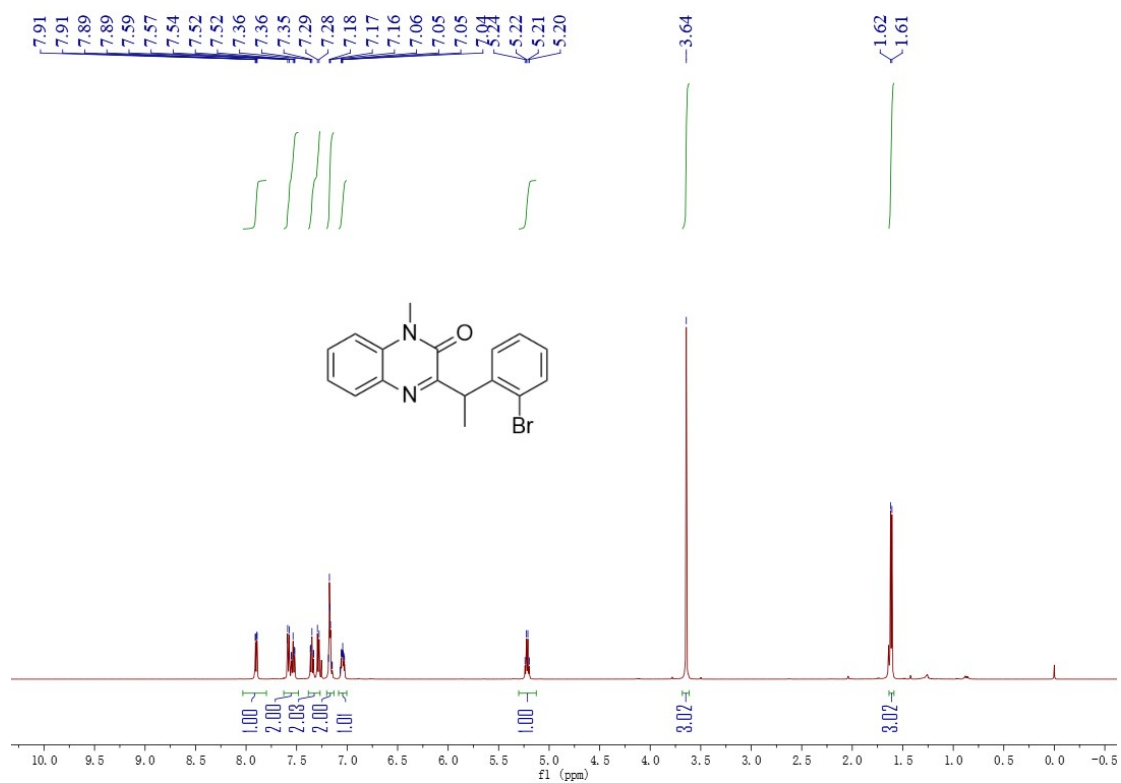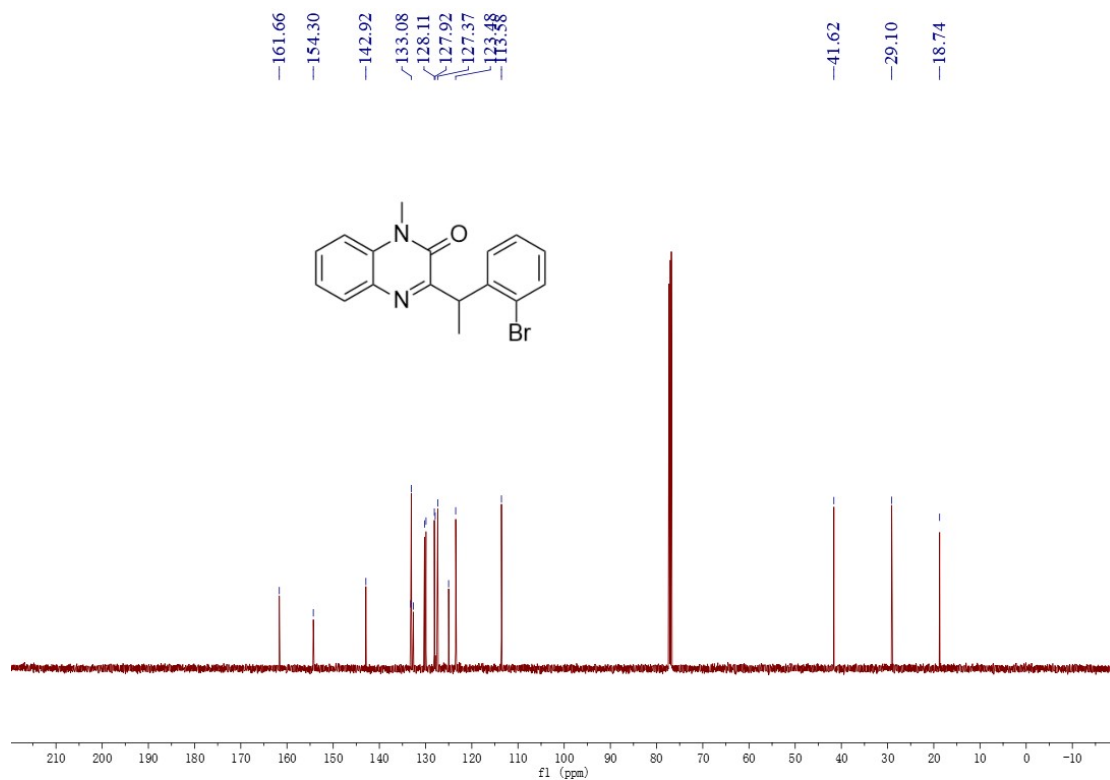

### NMR spectra of product **3o**

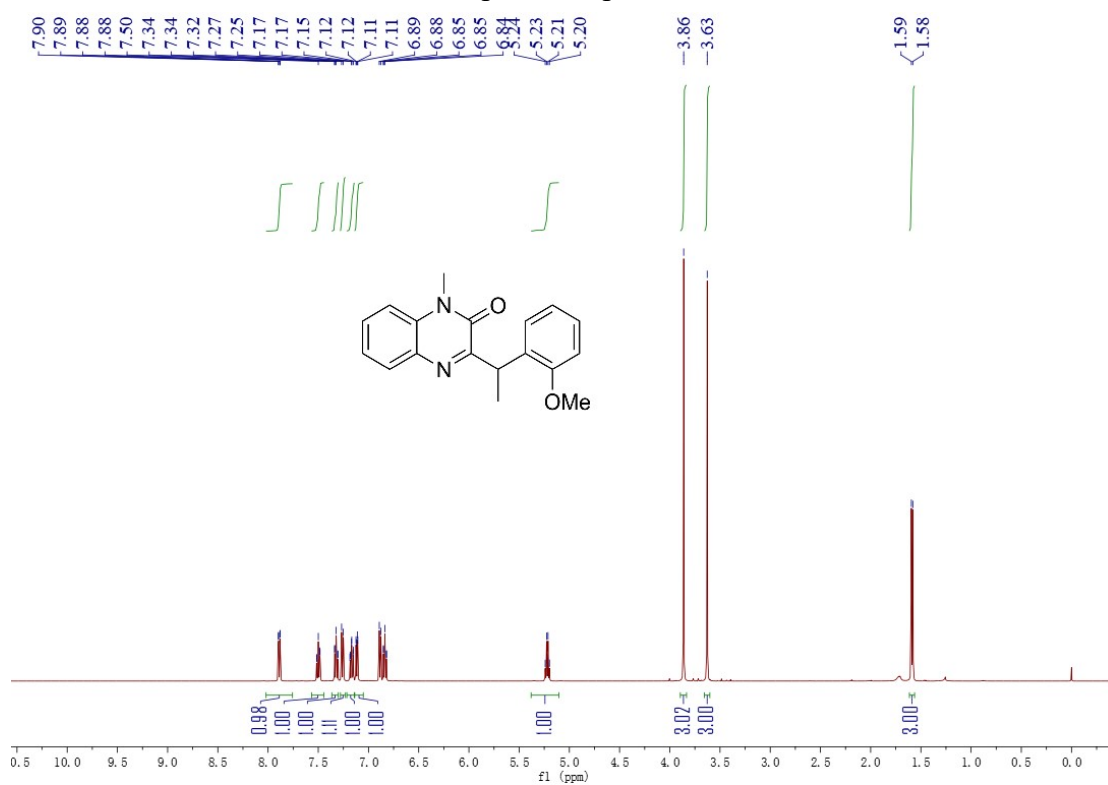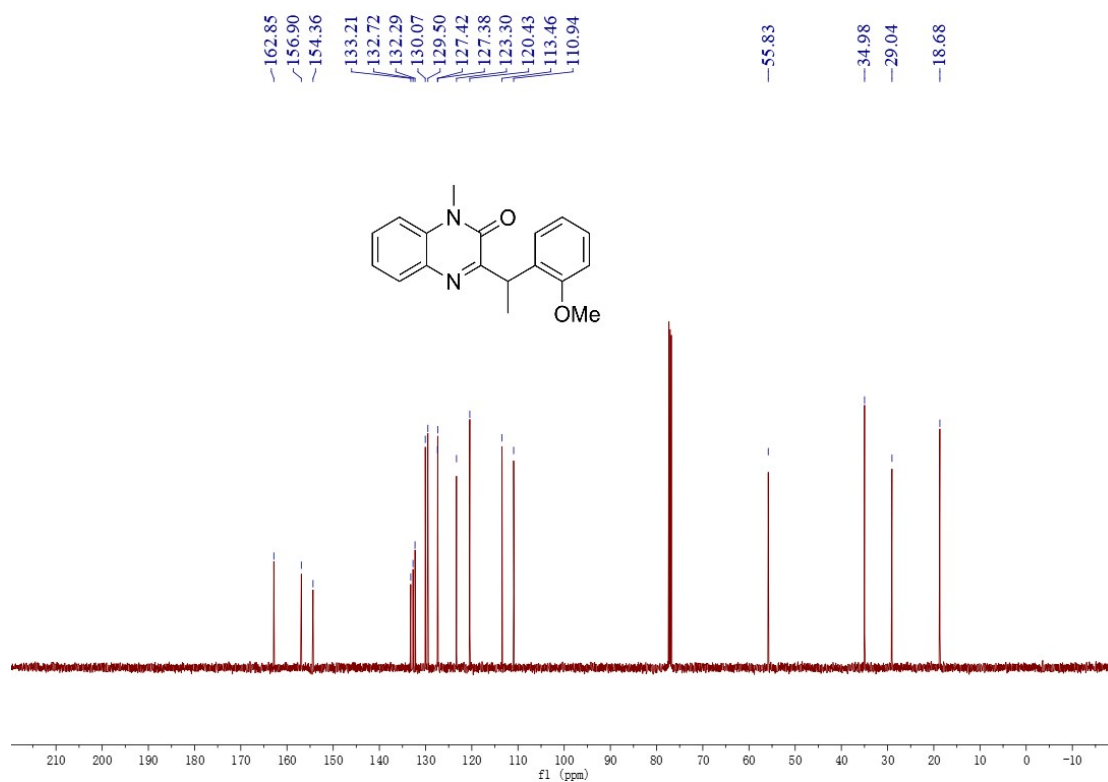

### NMR spectra of product 3p

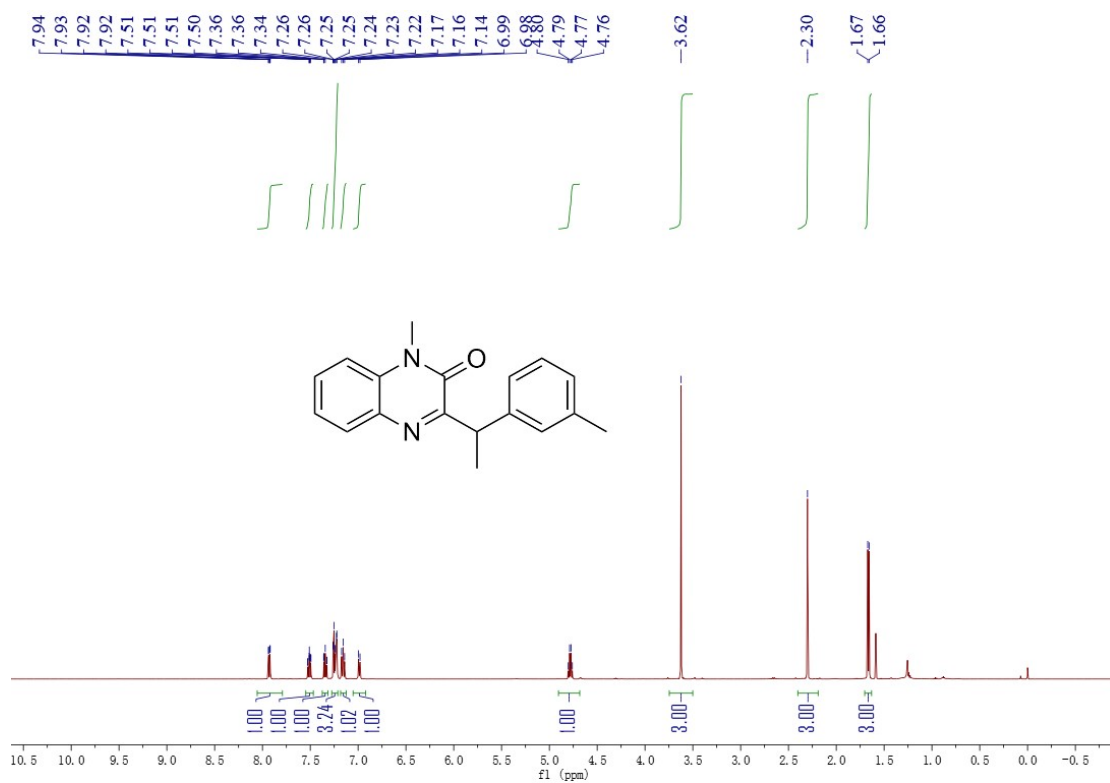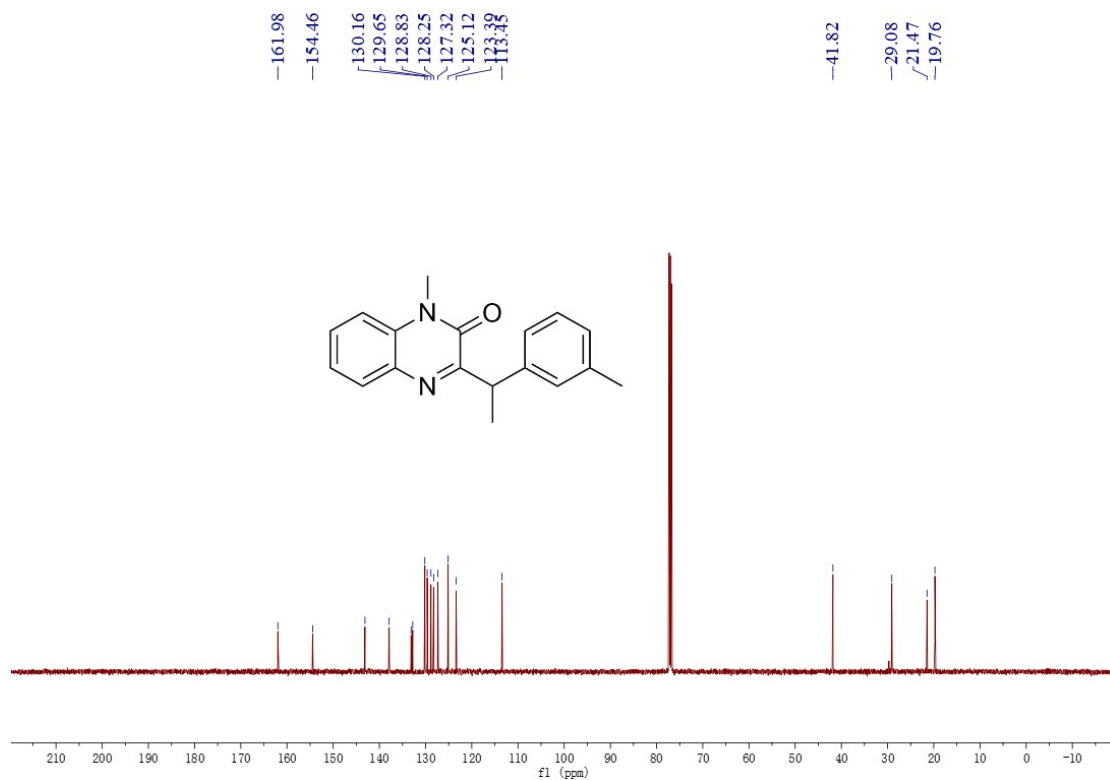



### NMR spectra of product 3q

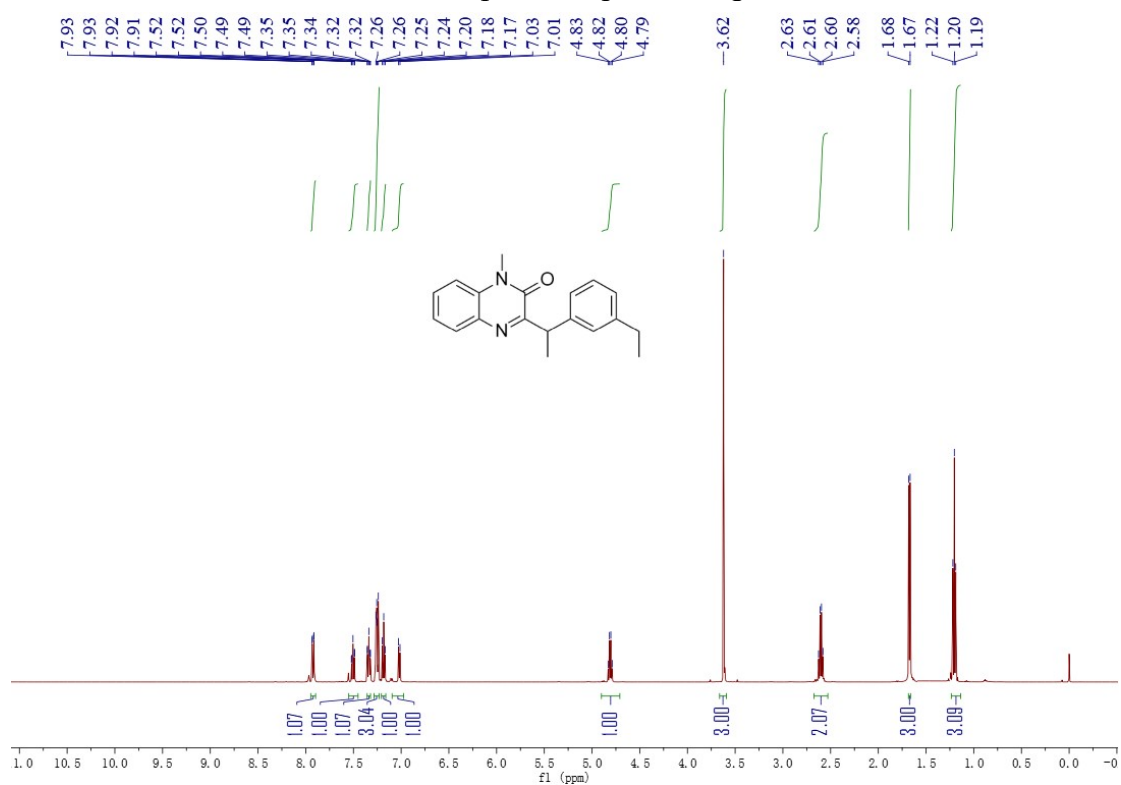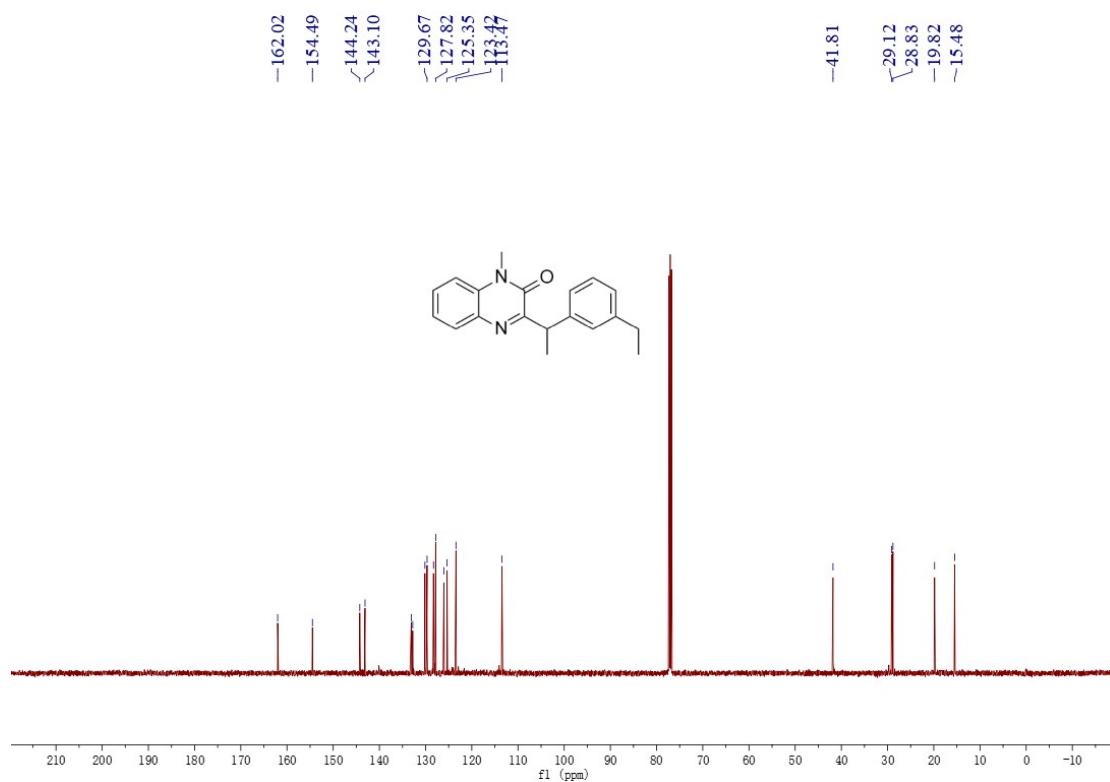

### NMR spectra of product 3r

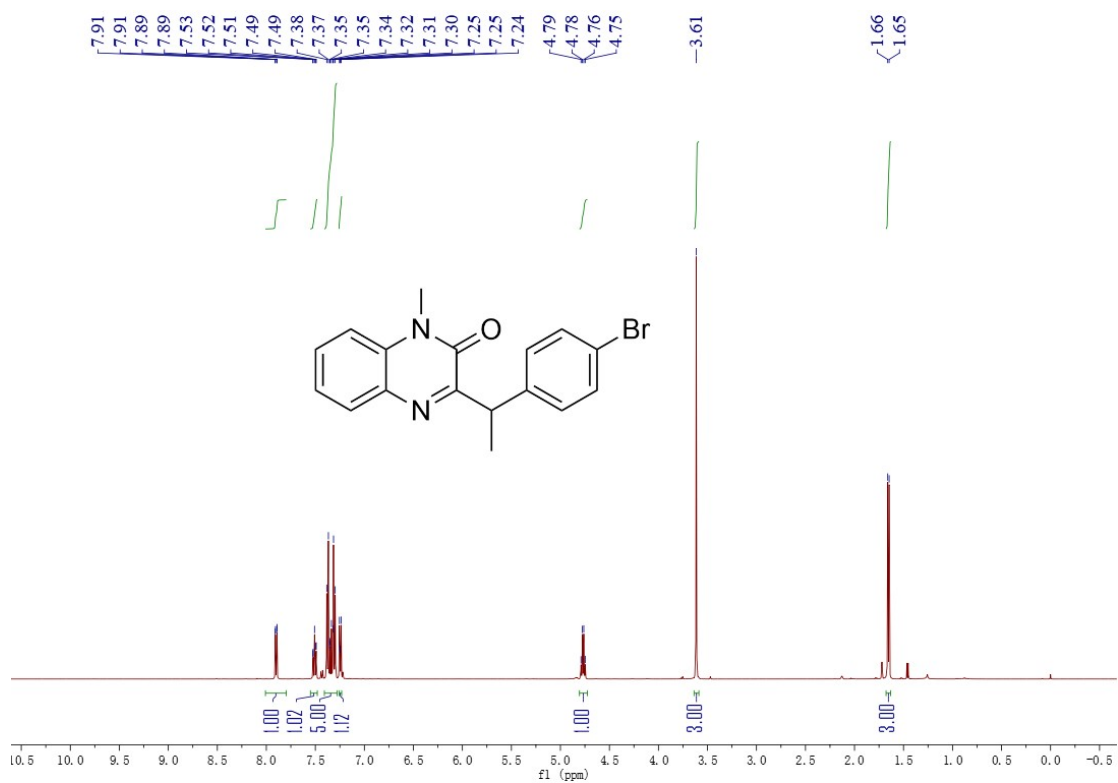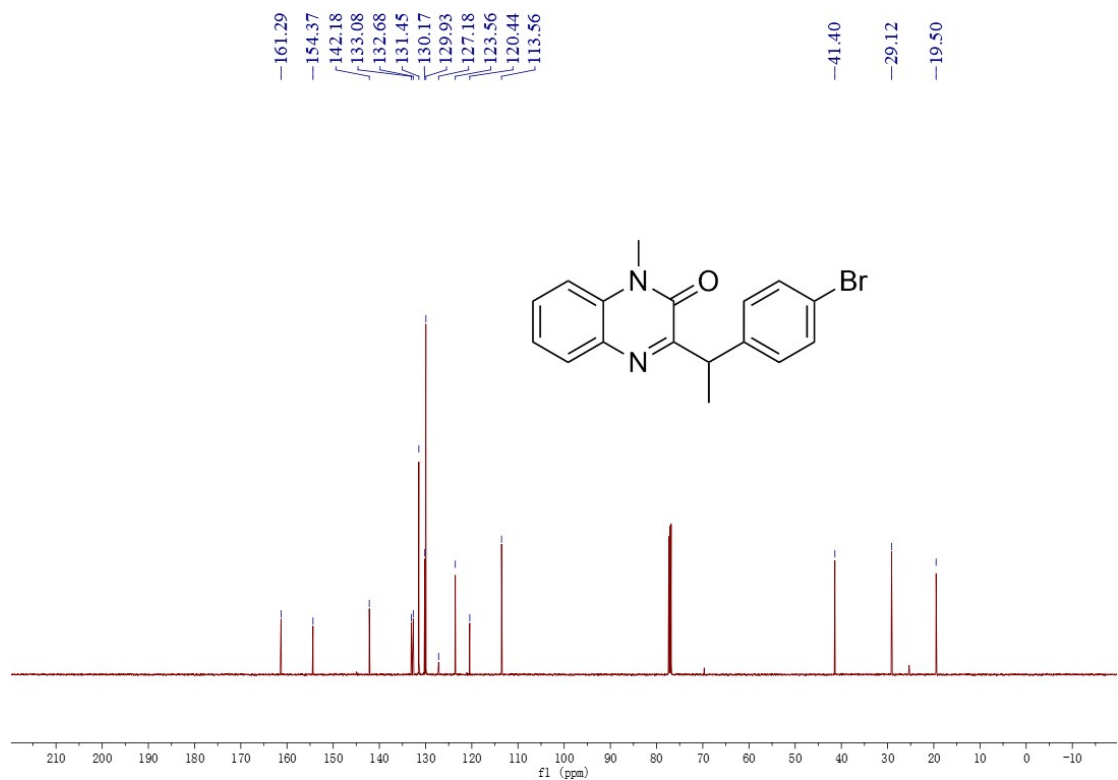

### NMR spectra of product 3s

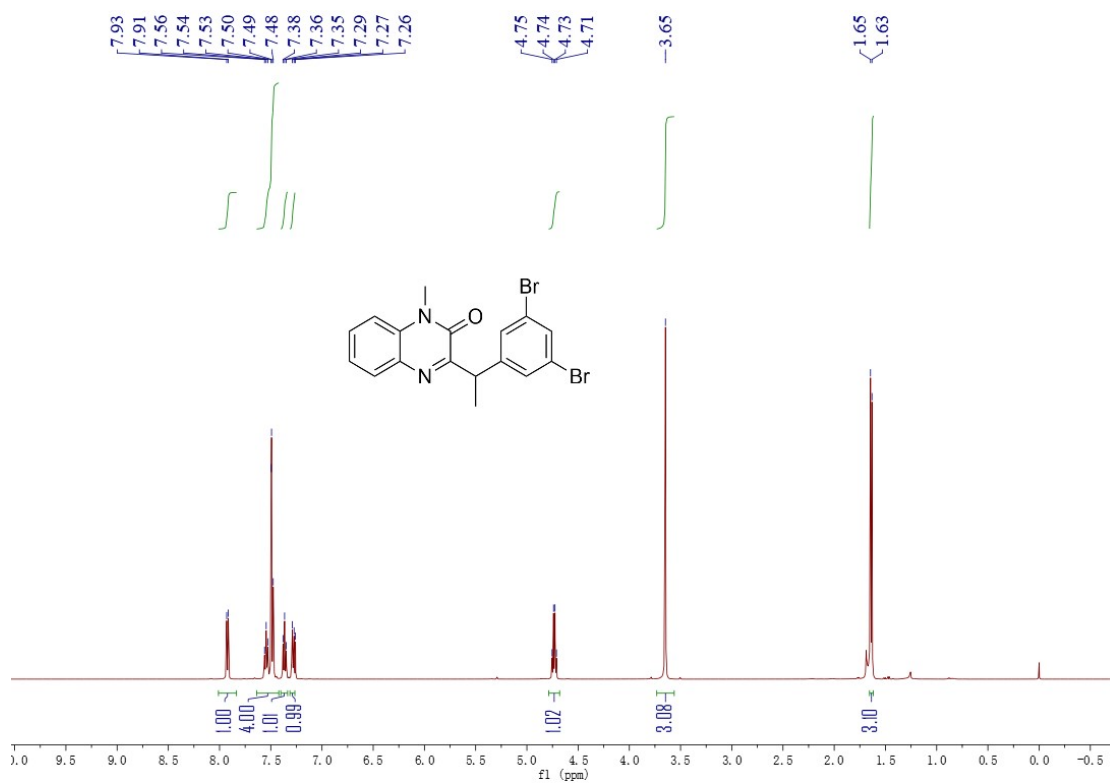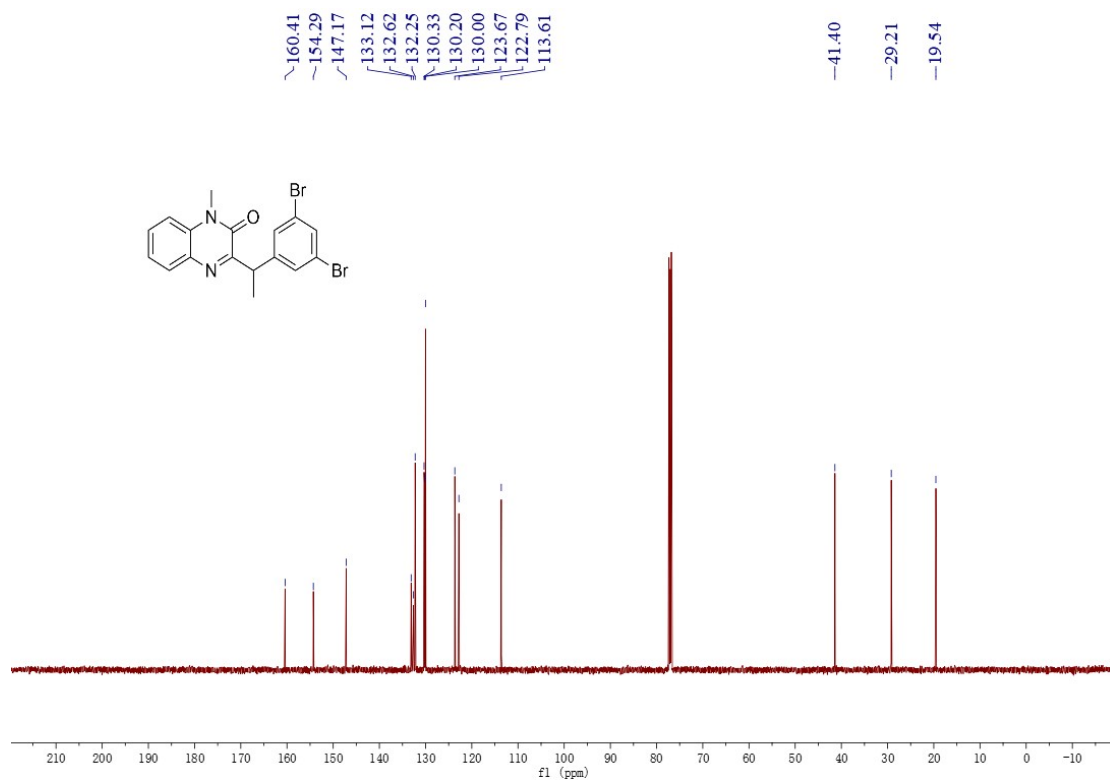

# NMR spectra of product 3t

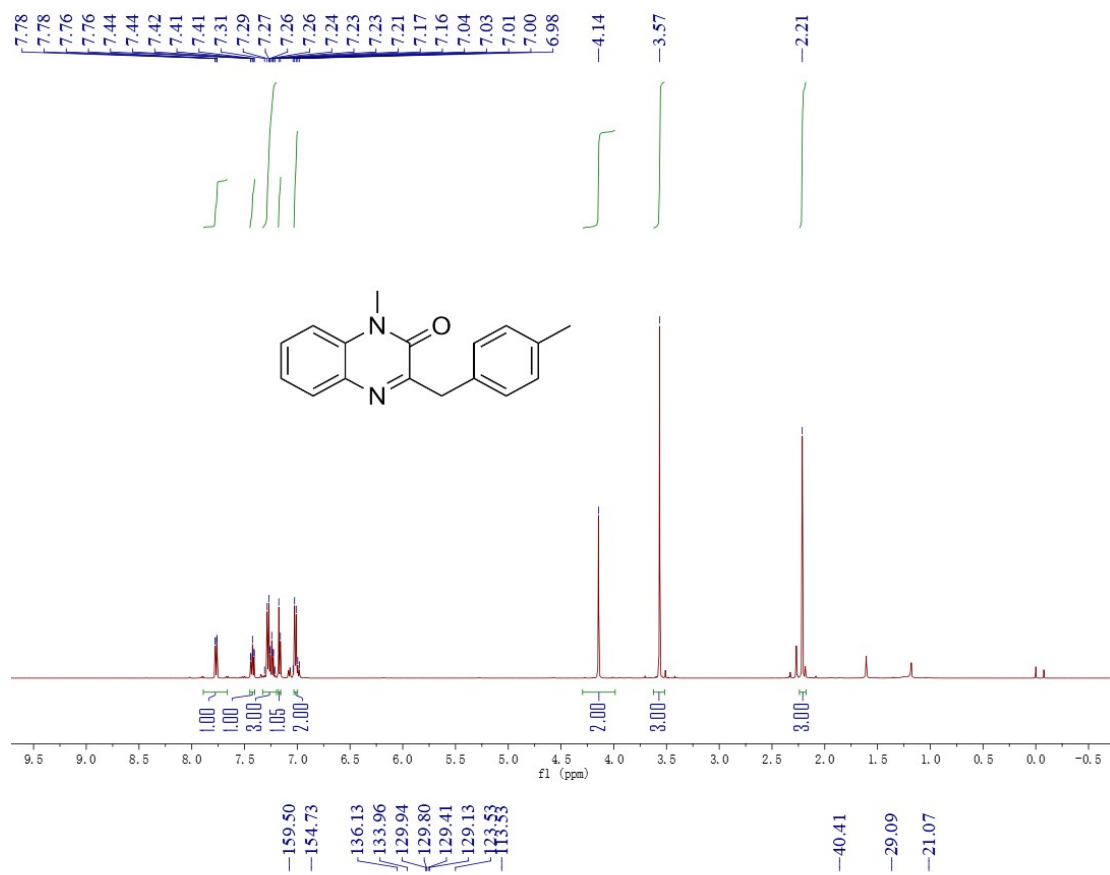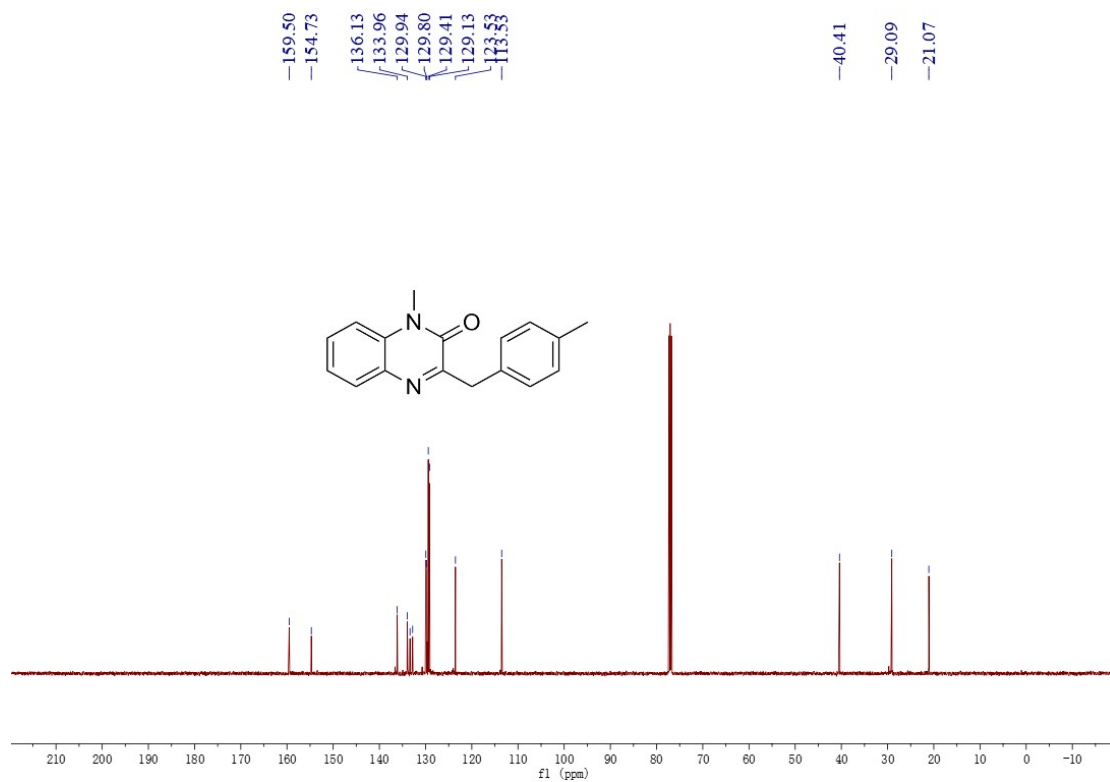

### NMR spectra of product **3u**

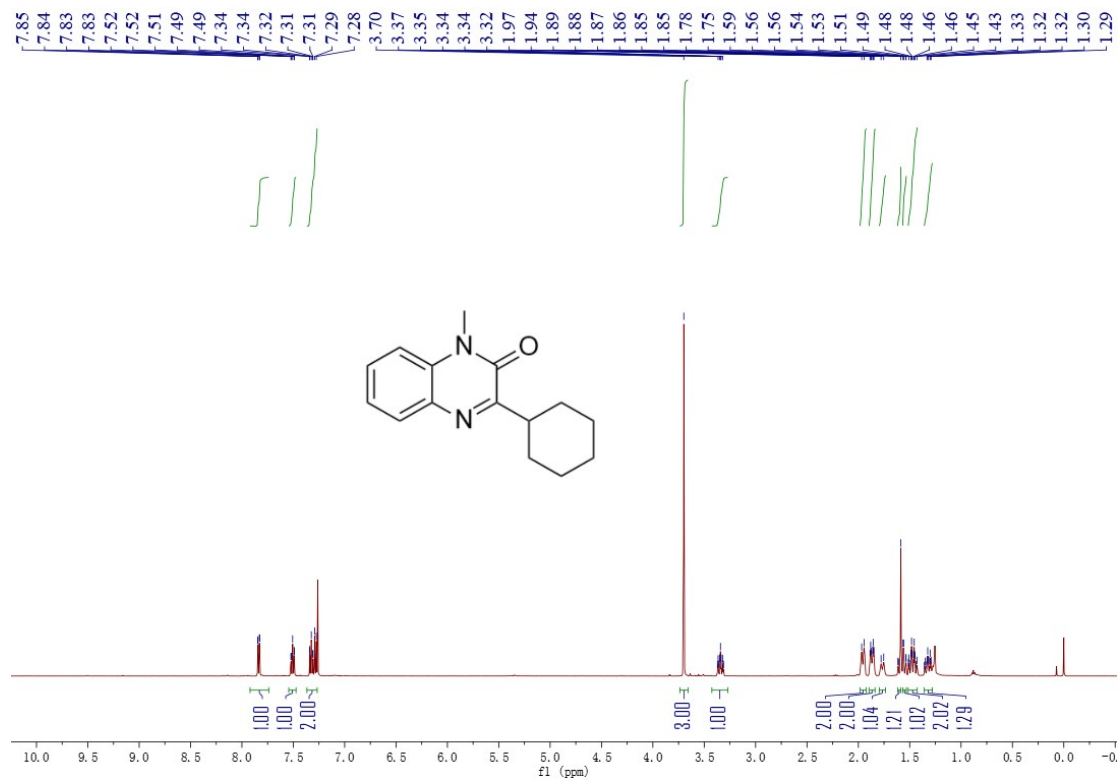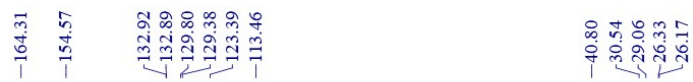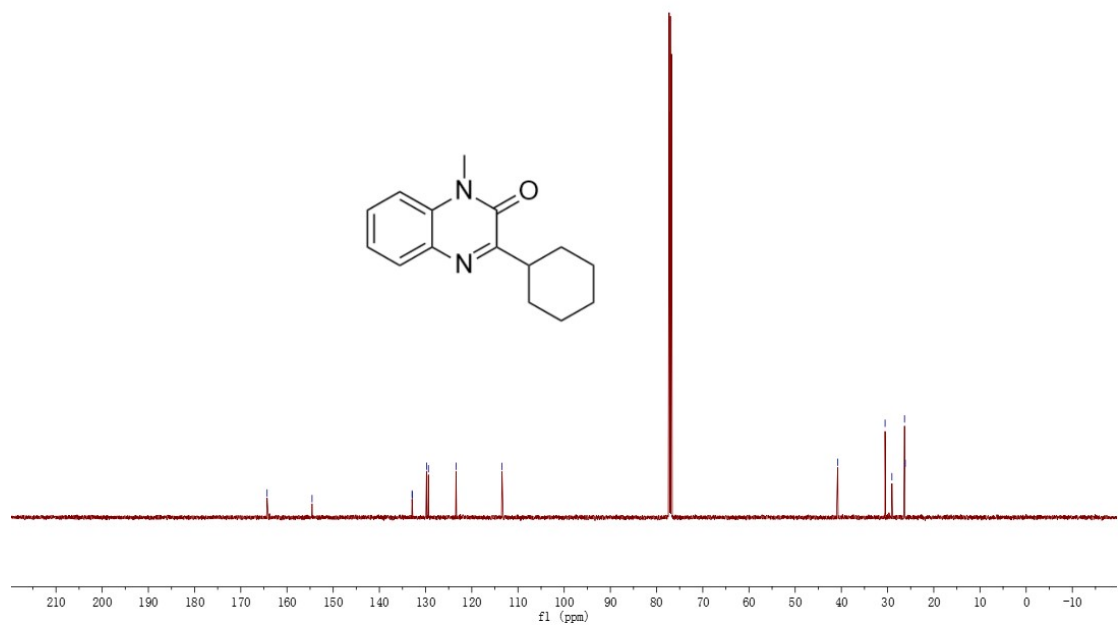

### NMR spectra of product 3v

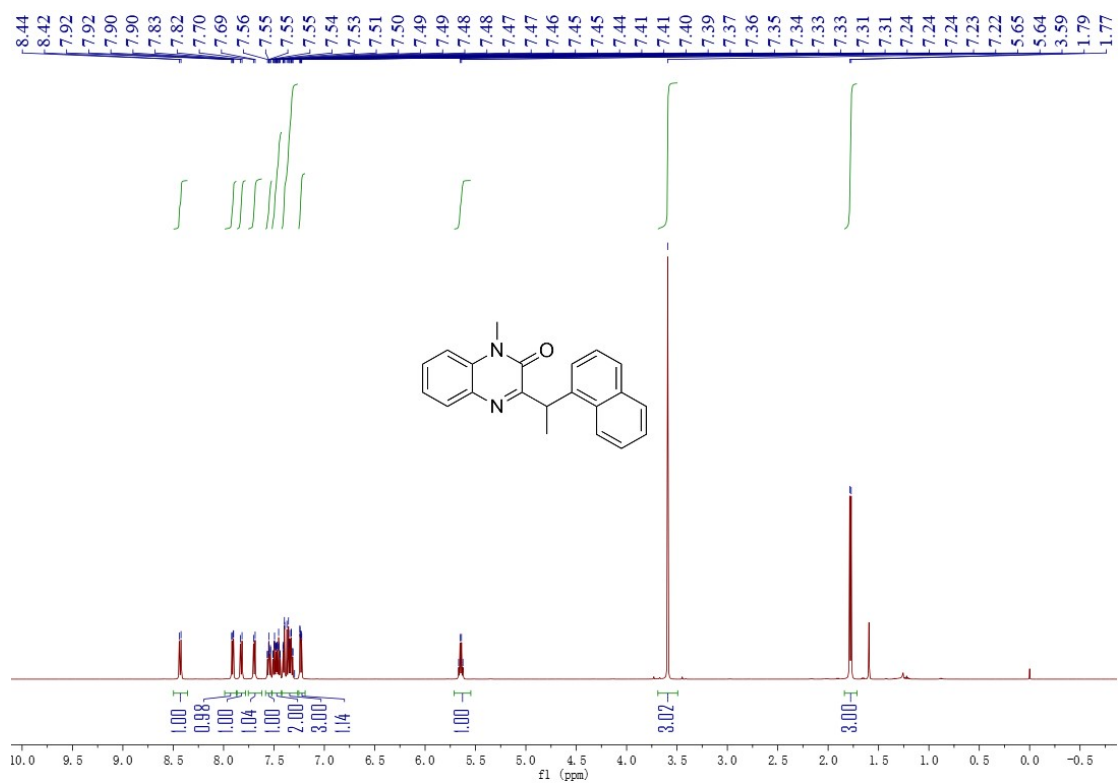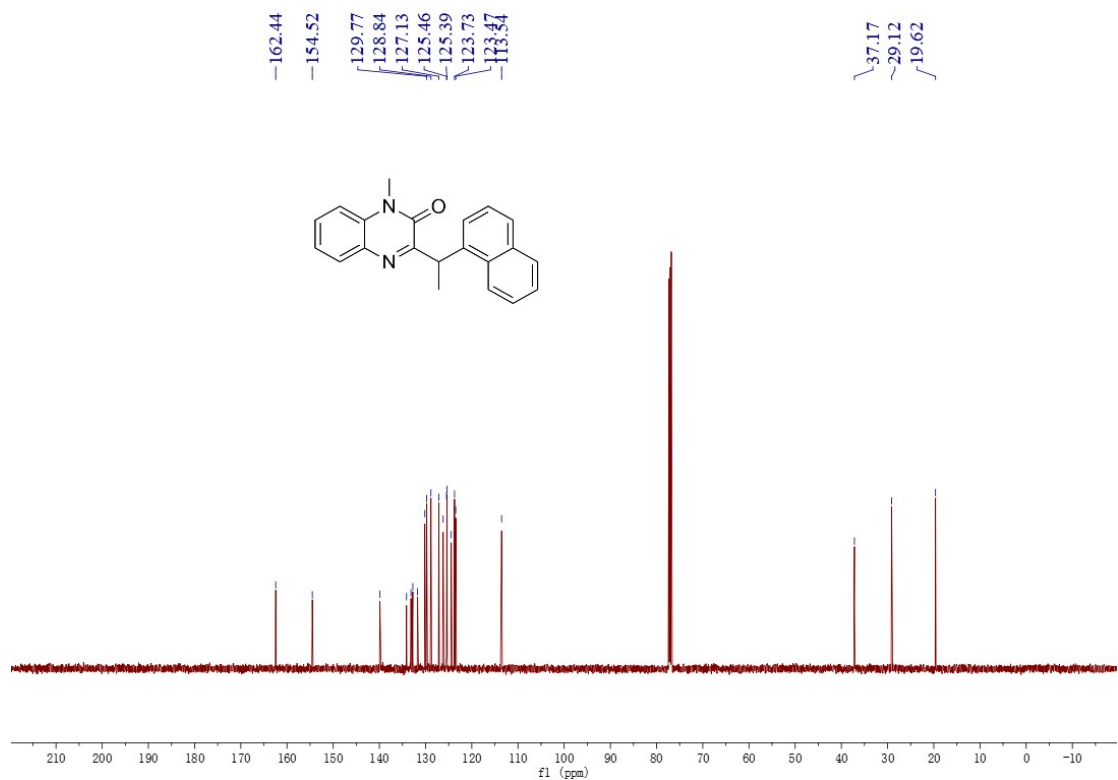

### NMR spectra of product 5

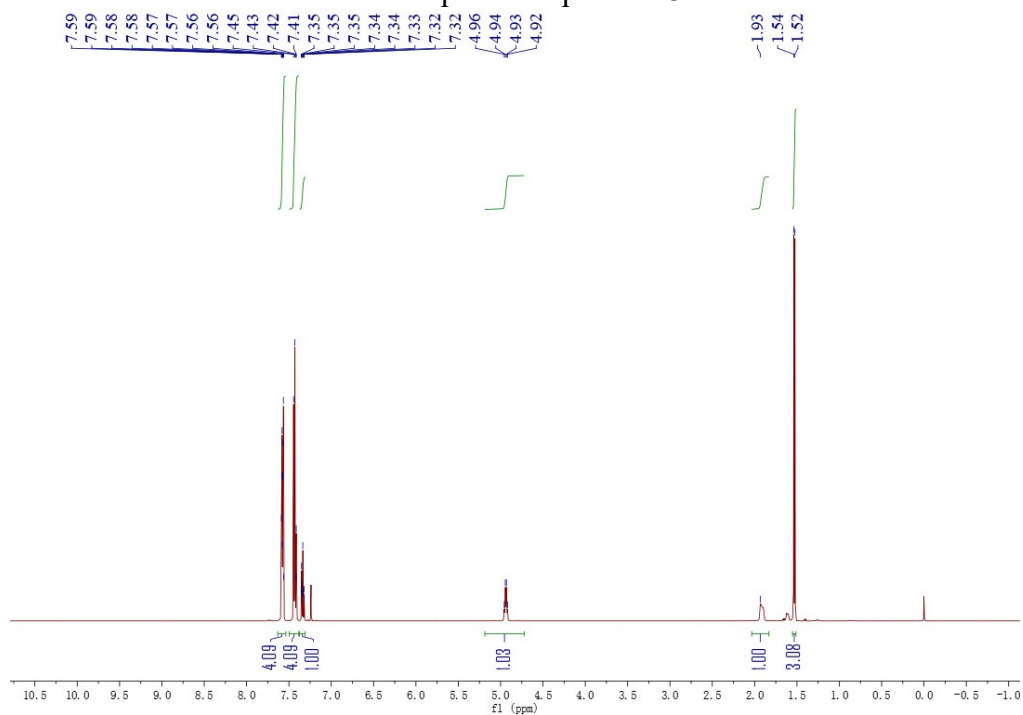

### References

[S1] K.-K. Niu, J. Cui, R.-Z. Dong, S. Yu, H. Liu and L.-B. Xing, *Chem. Commun.*, **2024**, *60*, 2409–2412.
